1 **Applied and Environmental Microbiology**

2

3

4

5 **CosR is a repressor of compatible solute biosynthesis and**  
6 **transporter systems**

7

8 Gwendolyn J. Gregory, Daniel P. Morreale, and E. Fidelma Boyd\*

9

10 **Department of Biological Sciences, University of Delaware, Newark, DE, 19716**

11 Corresponding author\*

12 E. Fidelma Boyd

13 Department of Biological Sciences

14 341 Wolf Hall, University of Delaware

15 Newark, DE 19716

16 Phone: (302) 831-1088. Fax: (302) 831-2281 Email: [fboyd@udel.edu](mailto:fboyd@udel.edu)

17 **Abstract**

18 Bacteria accumulate small, organic compounds, called compatible solutes, via uptake from the  
19 environment or biosynthesis from available precursors to maintain the turgor pressure of the cell  
20 in response to osmotic stress. *Vibrio parahaemolyticus* has biosynthesis pathways for the  
21 compatible solutes ectoine (*ectABCasp\_ect*) and glycine betaine (*betIBAprOXWV*), four betaine-  
22 carnitine-choline transporters (*bcct1-bcct4*) and a second ProU transporter (*proVWX*). Most of  
23 these systems are induced in high salt. CosR, a MarR-type regulator, which is divergently  
24 transcribed from *bcct3*, was previously shown to be a direct repressor of *ectABCasp\_ect* in  
25 *Vibrio* species. In this study, we investigated the role of CosR in glycine betaine biosynthesis and  
26 compatible solute transporter gene regulation. Expression analyses demonstrated that  
27 *betIBAprOXWV*, *bcct1*, *bcct3*, and *proVWX* are repressed in low salinity. Examination of an in-  
28 frame *cosR* deletion mutant shows induced expression of these systems in the mutant at low  
29 salinity compared to wild-type. DNA binding assays demonstrate that purified CosR binds  
30 directly to the regulatory region of each system. In *Escherichia coli* GFP reporter assays, we  
31 demonstrate that CosR directly represses transcription of *betIBAprOXWV*, *bcct3*, and *proVWX*.  
32 Similar to *V. harveyi*, we show *betIBAprOXWV* is positively regulated by the LuxR homolog  
33 OpaR. Bioinformatics analysis demonstrates that CosR is widespread within the genus, present  
34 in over 50 species. In several species, the *cosR* homolog was clustered with the *betIBAprOXWV*  
35 operon, which again suggests the importance of this regulator in glycine betaine biosynthesis.  
36 Incidentally, in four *Aliivibrio* species that contain ectoine biosynthesis genes, we identified  
37 another MarR-type regulator, *ectR*, clustered with these genes, which suggests the presence of a  
38 novel ectoine regulator. Homologs of EctR in this genomic context were present in *A. fischeri*, *A.*  
39 *finisterrensis*, *A. sifiae* and *A. wodanis*.

40 **Importance**

41 *Vibrio parahaemolyticus* can accumulate compatible solutes via biosynthesis and transport,  
42 which allow the cell to survive in high salinity conditions. There is little need for compatible  
43 solutes under low salinity conditions, and biosynthesis and transporter systems are repressed.  
44 However, the mechanism of this repression is not fully elucidated. CosR plays a major role in the  
45 repression of multiple compatible solute systems in *V. parahaemolyticus* as a direct negative  
46 regulator of ectoine and glycine betaine biosynthesis systems and four transporters. Homology  
47 analysis suggests that CosR functions in this manner in many other *Vibrio* species. In *Aliivibrio*  
48 species, we identified a new MarR family regulator EctR that clusters with the ectoine  
49 biosynthesis genes.

## 50 **Introduction**

51 Halophilic bacteria such as *Vibrio parahaemolyticus* encounter a range of osmolarities in  
52 the environment. To combat the loss of turgor pressure due to efflux of water in high osmolarity  
53 conditions, bacteria have developed a strategy that involves the accumulation of compatible  
54 solutes in the cell (1-3). Compatible solutes, as the name suggests, are organic compounds that  
55 are compatible with the molecular machinery and processes of the cell, and include compounds  
56 such as ectoine, glycine betaine, trehalose, glycerol, proline, glutamate, and carnitine, among  
57 others (1, 4-9). Compatible solutes are taken up from the environment or synthesized from  
58 various precursors in response to osmotic stress, which allows cells to continue to grow and  
59 divide even in unfavorable environments (2, 4, 10, 11).

60 *Vibrio parahaemolyticus* possesses compatible solute biosynthesis pathways for ectoine  
61 and glycine betaine (12). Ectoine biosynthesis is *de novo* in *V. parahaemolyticus*, requiring  
62 aspartic acid as the precursor, which can be supplied by the cell (13). Aspartic acid is converted  
63 to ectoine by four enzymes, EctA, EctB, EctC and Asp\_Ect, encoded by the operon  
64 *ectABCasp\_ect* (14). Ectoine biosynthesis begins with L-aspartate- $\beta$ -semialdehyde, which is also  
65 pivotal to bacterial amino acid and cell wall synthesis (14). Asp\_Ect is a specialized  
66 aspartokinase dedicated to the ectoine pathway that, among Proteobacteria, is present only in  
67 alpha, gamma and delta species (15). Searches of the genome database demonstrated that ectoine  
68 biosynthesis genes are present in nearly 500 species. Of these, nearly a third also produce 5-  
69 hydroxyectoine by the action of an additional gene product, ectoine hydroxylase, encoded by  
70 *ectD* (16). A recent study has shown that in *V. parahaemolyticus* the quorum sensing response  
71 regulator OpaR is a negative regulator of *ect* gene expression (17). It was also shown that in this

72 species, similar to *V. cholerae*, a multiple antibiotic resistance (MarR)-type regulator named  
73 CosR is a repressor of *ectABCasp\_ect* (17, 18).

74 Production of glycine betaine takes place in a two-step oxidation from the precursor  
75 choline, which is acquired exogenously. *De novo* biosynthesis of glycine betaine has been  
76 identified in only a few species of halophilic bacteria (19-24). The two-step oxidation proceeds  
77 with choline conversion to glycine betaine by the products of two genes *betB* and *betA*, which  
78 encode betaine-aldehyde dehydrogenase and choline dehydrogenase, respectively (25, 26). In *E.*  
79 *coli*, these genes are encoded by the operon *betIBA*, with the regulator BetI shown to repress its  
80 own operon (27, 28). In all *Vibrio* species that biosynthesize glycine betaine, the *betIBA* genes  
81 are in an operon with the *proXWV* genes, which encode a ProU transporter (12, 13, 29).

82 Regulation of glycine betaine biosynthesis has been studied in several species, but few direct  
83 mechanisms of regulation have been shown beyond BetI (27, 28, 30-33). In *V. harveyi*, a close  
84 relative of *V. parahaemolyticus*, *betIBAprOXWV* was shown to be positively regulated by the  
85 quorum sensing master regulator LuxR (32-33).

86 It is energetically favorable to the cell to uptake compatible solutes from the environment  
87 rather than to biosynthesize them, and Bacteria and Archaea encode multiple osmoregulated  
88 transporters (9, 34-39). ATP-binding cassette (ABC) transporters are utilized to import  
89 exogenous compatible solutes into the cell and include ProU (encoded by *proVWX*) in *E. coli* and  
90 *Pseudomonas syringae*, OpuA in *Lactococcus lactis* and *B. subtilis*, and OpuC in *P. syringae*  
91 (39-44). *V. parahaemolyticus* encodes two putative ProU transporters of the ABC transporter  
92 family, one on each chromosome. ProU1 is encoded on chromosome 1 by *proVWX* (VP1726-  
93 VP1728) and ProU2 is encoded on chromosome 2 by the *betIBAprOXWV* operon (VPA1109-  
94 VPA1114) (12). ProU1 is a homolog of the *E. coli* K-12 ProU, which in this species was shown

95 to bind glycine betaine with high affinity (41, 45, 46). ProU2 is a homolog of the *P. syringae*  
96 *proVXW* (12).

97 The betaine-carnitine-choline transporters (BCCTs) are single component transporters,  
98 the first of which, BetT, discovered in *E. coli*, was shown to transport choline with high-affinity  
99 and is divergently transcribed from *betIBA* (47, 48). *Vibrio parahaemolyticus* encodes four  
100 BCCTs, three, BCCT1-BCCT3 (VP1456, VP1723, VP1905), on chromosome 1 and one, BCCT4  
101 (VPA0356), on chromosome 2 (12). This is a typical complement of *bcct* genes present among  
102 members of the Campbellii clade, which includes *V. alginolyticus*, *V. campbellii*, *V. harveyi* and  
103 *V. parahaemolyticus*, amongst others (Naughton et al., 2009). The *bcct2* (VP1723) gene is the  
104 only *bcct* gene that is not induced by high salinity in *V. parahaemolyticus* (13). All four BCCT  
105 transporter were shown to transport glycine betaine amongst others (29). A study in *V. cholerae*  
106 demonstrated that a *bcct3* homolog is repressed by the regulator CosR and deletion of the *cosR*  
107 gene also affected biofilm formation and motility in this species (18).

108 In this study, we examined the broader role of CosR in the regulation of glycine betaine  
109 biosynthesis and compatible solute transport gene expression in *V. parahaemolyticus*. First, we  
110 examined expression of genes encoding osmotic stress response systems in low salinity and used  
111 quantitative real-time PCR to determine expression of these genes in a  $\Delta cosR$  deletion mutant.  
112 We then determined whether CosR was a direct regulator using DNA binding assays and an *E.*  
113 *coli* plasmid-based reporter assay. We also examined whether *betIBAprOXWV* was under the  
114 control of the LuxR homolog OpaR in *V. parahaemolyticus*, similar to what was shown in *V.*  
115 *harveyi*. We investigated the distribution of CosR and its genome context among *Vibrionaceae*.  
116 Our data indicate that CosR is a key regulator of the osmotic stress response in *V.*

117 *parahaemolyticus* under low salinity conditions. Distribution of CosR is widespread, and similar  
118 genomic context suggests CosR repression of compatible solutes is common among *Vibrio*.

## 119 **Results**

120 **Compatible solute biosynthesis and transport genes are downregulated in low salinity.** We  
121 have previously shown that *V. parahaemolyticus* does not produce compatible solutes ectoine  
122 and glycine betaine during growth in minimal media (M9G) supplemented with 1% NaCl  
123 (M9G1%) (12, 13). Here we quantified expression levels of both biosynthesis operons in  
124 M9G1% or M9G3%. RNA was isolated from exponentially growing wild-type *V.*  
125 *parahaemolyticus* RIMD2210633 cells, at optical density 595 nm (OD<sub>595</sub>) 0.45, after growth in  
126 M9G1% or M9G3%. Real time quantitative PCR (qPCR) was performed to determine relative  
127 expression levels. Expression analysis shows that ectoine biosynthesis genes *ectA* and *asp\_ect*  
128 are differentially expressed in M9G1% as compared to expression in M9G3%. *ectA* is  
129 significantly downregulated 794.6-fold and *asp\_ect* is significantly downregulated 204.9-fold in  
130 M9G1% (Fig. 1A). The *betIBAproXWV* operon is also significantly repressed in M9G1%, with  
131 fold changes of 25.8-fold, 22-fold, 33.7-fold, and 52.8-fold for *betI*, *betB*, *proX*, and *proW*,  
132 respectively (Fig. 1B).

133 We determined the expression levels of *bcct* genes in *V. parahaemolyticus* in both  
134 M9G1% and M9G3%. Expression of *bcct1*, *bcct3*, and *bcct4* are significantly repressed in  
135 M9G1%, 500-fold, 71.4-fold, and 11.6-fold, respectively, when compared with expression in  
136 M9G3% (Fig. 1C). The *bcct2* gene remained unchanged. We previously reported that *bcct2* is  
137 not induced by salinity (29), and our data indicates that it has a basal level of transcription in the  
138 cell based on similar Ct values in both salinities tested (data not shown). We then examined the

139 expression pattern of the ProU1 transporter genes in *V. parahaemolyticus*. The *proVI* gene is  
140 significantly repressed in M9G1%, with a 2,786-fold change as compared to M9G3% (Fig. 1C).  
141 Overall, the data demonstrates osmoregulation of ectoine and glycine betaine biosynthesis genes  
142 and transporter genes *bcct1*, *bcct3*, *bcct4* and *proVWX*.

143 **CosR represses compatible solute biosynthesis and transport genes in low salinity.** Next, we  
144 wanted to determine how these compatible solute systems are repressed in *V. parahaemolyticus*.  
145 Since we know CosR is a repressor of ectoine biosynthesis genes, we wondered whether it  
146 played a broader role in repression of the osmotic stress response genes, *betIBAprOXWV* operon,  
147 *proVWX*, and *bcct* transporters, in low salt conditions. We examined expression of these genes in  
148 wild-type and an in-frame deletion mutant of *cosR*. RNA was isolated from the  $\Delta cosR$  mutant  
149 strain at mid-exponential phase (OD<sub>595</sub> 0.45) after growth in M9G1% and compared to wild-type  
150 RIMD2210633 grown under identical conditions. Using qPCR analysis, we determined the  
151 expression levels of *ectA* and *asp\_ect* and show they are significantly induced, 818.5-fold and  
152 308.2-fold, respectively, in a  $\Delta cosR$  mutant compared to wild-type in M9G1% (Fig. 2A). Next,  
153 we examined expression levels of *betIBAprOXWV* after growth in M9G1% in the  $\Delta cosR$  and  
154 wild-type strains using qPCR. The *betI*, *betB*, *proX2* and *proW2* genes are significantly induced  
155 in the  $\Delta cosR$  mutant with *betI* expressed 13.75-fold, *betB* 10.18-fold, *proX2* 8.23-fold, and  
156 *proW2* 16.38-fold more than in the wild-type strain (Fig. 2B). Similarly, we examined levels of  
157 the *bcct* genes and *proVI* in a  $\Delta cosR$  mutant versus the wild-type in M9G1%. Relative  
158 expression levels of *bcct1* are 155.66-fold higher and levels of *bcct3* are 34.97-fold higher than  
159 wild-type levels, while levels of *bcct2* and *bcct4* are unchanged (Fig. 2C). The *proVI* gene is  
160 induced 379.5-fold in the  $\Delta cosR$  mutant over the wild-type strain (Fig. 2C). In sum, these data



161 demonstrate that CosR is a repressor of *ectABCasp\_ect*, *betIBAproXWV*, *bcct1*, *bcct3* and  
162 *proVWX* under low salinity conditions.

163 **CosR binds directly to the promoter of the *betIBAproXWV* operon and represses**

164 **transcription.** Previously, we found that CosR binds to the regulatory region of the ectoine  
165 biosynthesis operon and represses transcription (17). To determine whether CosR regulation of  
166 the glycine betaine biosynthesis operon is also direct, we performed DNA binding assays with  
167 purified CosR protein and DNA probes of the regulatory region of this operon. The regulatory  
168 region was split into five overlapping probes, *PbetI* probes A-E, of sizes 125-bp, 112-bp, 142-bp,  
169 202-bp, and 158-bp (Fig. 3A). CosR bound to probe A, which is directly upstream of the start  
170 codon for *betI*, and it also bound to probes B and D (Fig. 3B). CosR did not bind to probes C and  
171 E, demonstrating specificity of CosR binding (Fig. 3B).

172 To demonstrate that direct binding by CosR results in transcriptional repression of the  
173 *betIBAproXWV* operon, we performed a GFP-reporter assay in *E. coli* strain MKH13. Full-length  
174 *cosR* was expressed from a plasmid (pBBR*cosR*) in the presence of a *gfp*-expressing reporter  
175 plasmid under the control of the glycine betaine biosynthesis system regulatory region (*P<sub>betI</sub>-gfp*).  
176 Relative fluorescence and OD<sub>595</sub> were measured after overnight growth in M9G1%. Specific  
177 fluorescence was calculated by normalizing to OD and compared to specific fluorescence in a  
178 strain with an empty expression vector (pBBR1MCS) that also contained the *P<sub>betI</sub>-gfp* reporter  
179 plasmid. The activity of the *P<sub>betI</sub>-gfp* reporter was significantly repressed 4.84-fold as compared  
180 to the empty vector strain (Fig. 3C). This indicates that CosR directly represses transcription of  
181 the *betIBAproXWV* genes.

182 **CosR binds directly to the promoter of *bcct1* and *bcct3*.** Next, we wanted to investigate  
183 whether CosR repression of *bcct1* and *bcct3* was direct. We designed probes upstream of the  
184 translational start for *bcct1* and *bcct3*. The 291-bp regulatory region of *Pbcct1*, which includes  
185 15-bp of *bcct1* and 276-bp of the intergenic region, was split into three overlapping probes,  
186 *Pbcct1* probes A, B, and C, 120-bp, 110-bp, and 101-bp, respectively (Fig. 4A). DNA binding  
187 assays were performed with increasing concentrations of CosR. CosR bound directly to the  
188 *Pbcct1* probe B (Fig. 4B) but did not bind to the other probes tested, indicating that regulation by  
189 CosR is direct and binding is specific. We then performed GFP reporter assays in *E. coli* using a  
190 GFP expression plasmid under the control of the regulatory region of *bcct1*. and a CosR  
191 expression plasmid (pBBR*cosR*). Specific fluorescence in the presence of CosR was compared to  
192 a strain with empty expression vector (pBBR1MCS). The activity of the *P<sub>bcct1</sub>-gfp* reporter was  
193 not significantly different than the strain harboring empty expression vector (Fig. 4C), indicating  
194 that CosR does not directly repress *bcct1*.

195 Two overlapping probes designated *Pbcct3* probe A and B, 108-bp and 107-bp,  
196 respectively, were designed encompassing 196-bp of the regulatory region of *bcct3* (Fig. 5A).  
197 Because *bcct3* is divergently transcribed from *cosR*, we used approximately half of the  
198 regulatory region for the *Pbcct3* EMSA. An EMSA showed that CosR bound directly to the  
199 *Pbcct3* probe A, which is proximal to the start of the gene, but not probe B (Fig. 5B). We then  
200 performed GFP reporter assays in *E. coli* using a GFP expression plasmid under the control of  
201 the regulatory region of *bcct3*, utilizing the entire 397-bp intergenic region between *bcct3* and  
202 *cosR*. Transcriptional activity of the *P<sub>bcct3</sub>-gfp* reporter is significantly repressed in a CosR-  
203 expressing strain, indicating that CosR directly represses transcription of *bcct3* (Fig. 5C). In  
204 addition, we showed that CosR does not bind to the regulatory region of *bcct2* and *bcct4* (Fig.

205 5D), which is in agreement with the *cosR* mutant expression data (Fig. 2C). These data suggest  
206 that *bcct2* and *bcct4* are under the control of a yet to be described regulator.

207 **CosR binds directly to the *proVWX* regulatory region.** We also examined direct regulation of  
208 the *proVWX* operon on chromosome 1 by CosR. The regulatory region upstream of the *proVI*  
209 gene was divided into four probes, 160-bp, 134-bp, 108-bp and 109-bp (Fig. 6A). A DNA  
210 binding assay was performed with increasing concentrations of CosR and 30 ng of each probe. A  
211 shift in the DNA bands of probe D, which is proximal to the start codon of *proVI*, indicates that  
212 CosR binds directly to this region (Fig. 6B). CosR did not bind to the other probes tested,  
213 indicating that CosR binding is specific.

214 We also performed a GFP-reporter assay in *E. coli* utilizing the *cosR* expression plasmid  
215 (pBBRcosR) and a GFP reporter plasmid under the control of the *proVWX* regulatory region  
216 ( $P_{proVI-gfp}$ ). We found that in a CosR-expressing strain, expression of the  $P_{proVI-gfp}$  reporter was  
217 significantly repressed when compared to an empty expression vector strain (Fig. 6C). This  
218 indicates that CosR is a direct repressor of the *proVWX* operon.

219 **CosR is a MarR-type regulator that does not participate in an autoregulatory feedback**  
220 **loop.** In *V. cholerae*, expression levels of *cosR* are upregulated in 0.5 M NaCl as compared to  
221 levels in 0.2 M NaCl (18). It was suggested that one reason for the upregulation of *cosR* in higher  
222 salinity could be that it is involved in an autoregulatory feedback loop (18). In *V.*  
223 *parahaemolyticus*, we found that levels of *cosR* are not significantly upregulated in moderate  
224 salinity (3% NaCl) as compared to low salinity (1% NaCl) (data not shown). We have already  
225 shown that CosR binds to the intergenic region between *bcct3* and *cosR*, but the binding site  
226 location is proximal to the start codon of *bcct3*, more than 300 bp upstream of the *cosR* gene  
227 (Fig. 5A & B). Therefore, to investigate CosR autoregulation, we designed two probes, 105-bp

228 and 142-bp, which comprise a 220-bp portion of the regulatory region upstream of *cosR*  
229 (VP1906) (Fig. 7A) and used this in a DNA binding assay with various concentrations of  
230 purified CosR (Fig. 7B). There are no shifts observed in the binding assay, indicating that CosR  
231 does not bind (Fig. 7B). We then performed a GFP reporter assay in *E. coli*, utilizing the entire  
232 397-bp intergenic region between *bcct3* and *cosR*, to determine if CosR directly represses  
233 transcription of its own gene. The transcriptional activity of  $P_{cosR}$ -*gfp* in the presence of CosR  
234 was not significantly different from the empty-vector strain (Fig. 7C). We therefore conclude  
235 that under these conditions, in *V. parahaemolyticus* CosR does not autoregulate, and that the  
236 CosR binding site proximal to the *bcct3* gene does not affect transcription of the *cosR* gene.

237 **BetI represses its own operon in the absence of choline.** Previously, it was shown that BetI  
238 represses its own operon in several bacterial species and this repression is relieved in the  
239 presence of choline (27, 31, 32). To demonstrate BetI regulates its own operon in *V.*  
240 *parahaemolyticus*, we performed a plasmid-based GFP reporter assay utilizing the  $P_{betI}$ -*gfp*  
241 reporter in RIMD2210633 strain and a  $\Delta betI$  mutant strain. Strains were grown overnight in  
242 M9G3%, with and without choline, and specific fluorescence was calculated. Expression of the  
243 reporter is significantly induced in the  $\Delta betI$  mutant when no choline is present, indicating that  
244 BetI is a negative regulator of its own operon (Fig. 8A). In the presence of choline, there is no  
245 longer a significant difference in reporter activity between the wild-type strain and the  $\Delta betI$   
246 mutant strain, indicating that repression by BetI is relieved (Fig. 8B).

247 To determine whether regulation of *betIBA*<sub>ProXWV</sub> by BetI is direct, we performed a  
248 GFP reporter assay in *E. coli* MKH13 strain. The  $P_{betI}$ -*gfp* reporter utilized in our *in vivo* reporter  
249 assay was introduced into the *E. coli* MKH13 strain (which lacks its own *betIBA* operon) along

250 with an expression vector harboring full-length *betI* under the control of an IPTG-inducible  
251 promoter. In the BetI-expressing strain,  $P_{betI-gfp}$  expression was significantly repressed,  
252 indicating that BetI is a direct repressor of its own operon in *V. parahaemolyticus* (Fig. 8C).

### 253 **The LuxR homolog OpaR is a positive regulator of *betI**B**A**proXWV* in *V. parahaemolyticus*.**

254 It was demonstrated in *V. harveyi* that LuxR, the quorum sensing master regulator, induces  
255 *betI**B**A**proXWV* expression and that this regulation is direct (32). We examined expression of the  
256  $P_{betI-gfp}$  reporter in wild-type and the  $\Delta opaR$  mutant in *V. parahaemolyticus*. Expression of the  
257 reporter is significantly repressed in  $\Delta opaR$ , indicating that OpaR is a positive regulator of the  
258 glycine betaine biosynthesis operon in *V. parahaemolyticus* (Fig. 9A). We also examined  
259 whether regulation of  $P_{betI}$  by OpaR was direct utilizing an EMSA with purified OpaR protein.  
260 The  $P_{betI}$  probes A-E used previously in the CosR EMSA (Fig. 3A) were incubated with  
261 purified OpaR. OpaR bound to all  $P_{betI}$  probes, indicating that regulation of *betI**B**A**proXWV* by  
262 OpaR is direct (Fig. 9B).

### 263 **Distribution of compatible solute biosynthesis and transport systems in *Vibrionaceae*.**

264 CosR, a MarR family regulator, in *V. parahaemolyticus* is a 158 amino acid protein that is  
265 divergently transcribed from *bcct3* on chromosome 1. Our BLAST analysis showed that a CosR  
266 homolog is present in over 50 *Vibrio* species and in all cases the *cosR* homolog was divergently  
267 transcribed from a *bcct* transporter. Within these *Vibrio* species, homology ranged from 98% to  
268 73% amino acid identity. We found that in *V. splendidus*, *V. crassostreae*, *V. cyclitrophicus*, *V.*  
269 *celticus*, *V. lentus* and *Aliivibrio wodanis*, the CosR homolog is present directly downstream of  
270 the *betI**B**A**proXWV* operon on chromosome 2 (**Fig. 10**). CosR in these species share ~73-75%  
271 amino acid identity with CosR in *V. parahaemolyticus*. In *V. tasmaniensis* strains and *Vibrio sp.*

272 MED222, the CosR homolog is also downstream of the betaine biosynthesis operon and the  
273 operon for ectoine biosynthesis clusters in the same genome location (**Fig. 10**). In two *Aliivibrio*  
274 *wodanis* strains, AWOD1 and 06/90/160, *cosR* homologs were clustered with putative  
275 transporters and the glycine betaine biosynthesis operon. In all strains of *Aliivibrio fischeri*, the  
276 *cosR* homolog (which shares 73% amino acid identity with CosR from *V. parahaemolyticus*)  
277 clusters with two uncharacterized transporters. However, a second MarR family regulator, a 141  
278 amino acid protein, which we name *ectR*, clusters with the ectoine biosynthesis genes in this  
279 species. EctR shares only 31% identity with less than 60% query coverage to CosR from *V.*  
280 *parahaemolyticus* and a similar level of low amino acid identity to EctR1 from *Methylmicrobium*  
281 *alcaliphilum*. EctR was also clustered with the *ectABCasp\_ect* genes in all strains of *Aliivibrio*  
282 *finisterrensis*, *Aliivibrio sifiae*, and most *A. wodanis* strains. Thus, in *Aliivibrio* species, it  
283 appears that the ectoine gene cluster has a new uncharacterized regulator of the MarR family,  
284 which was confined to this group.

## 285 **Discussion**

286 Here we have shown that the compatible solute biosynthesis and transport genes are  
287 downregulated in *V. parahaemolyticus* in low salinity. Our genetic analysis, binding analysis,  
288 and reporter assays demonstrate that the transcriptional regulator CosR is a direct repressor of  
289 *betIBAprOXWV*, *bcct3*, and *proVWX* in low salinity. Additionally, we show that under the  
290 conditions tested, CosR is not autoregulated in *V. parahaemolyticus*. Our bioinformatics analysis  
291 indicates that CosR repression of compatible solute systems is likely widespread within the  
292 *Vibrio* genus.

293 Although CosR binds directly to the regulatory region of *bcct1*, transcription was not  
294 directly repressed in our reporter assay. Based on our expression data combined with our DNA-

295 binding assays, we speculate it is probable that CosR also directly represses *bcct1* expression, but  
296 we could not detect significant differences between the CosR- and empty vector-expressing  
297 strains due to the low level of activation of the *bcct1* regulatory region in *E. coli*.

298 CosR characterized from *Vibrio* species show ~50% amino acid identity to EctR1, a  
299 MarR-type regulator in the halotolerant methanotroph *Methylmicrobium alcaliphilum* (49). In  
300 this species, *ectR1* is divergently transcribed from the same promoter as *ectABC-asp\_ect*.  
301 Mustakhimov and colleagues showed that EctR1 repressed expression of the *ectABC-ask* operon  
302 in response to low salinity (49). Purified EctR1 bound specifically to the promoter of *ectABC-*  
303 *ask*, indicating direct regulation by EctR1 (49). EctR repression of the ectoine biosynthesis genes  
304 was also shown in both *Methylophaga alcalica* and *Methylophaga thalassica*, two moderately  
305 halophilic methylotrophs (50, 51). In *V. cholerae*, CosR was also identified as a repressor of  
306 ectoine biosynthesis genes though it does not cluster with *ectABC-asp\_ect* (18). The *cosR* gene  
307 in *V. cholerae* is divergently transcribed from the *opuD* gene (a *bcct3* homolog), which is also  
308 repressed by CosR (18). Similarly, in *V. parahaemolyticus*, the *cosR* (VP1906) homolog is  
309 divergently transcribed from *bcct3* (VP1905). In this species, we demonstrated previously that  
310 CosR is a direct negative regulator of *ectABCasp\_ect* and show here that it directly represses  
311 *bcct3* (17). Our bioinformatics analysis found that the CosR homolog is divergently transcribed  
312 from *bcct3* in over 50 *Vibrio* species demonstrating conservation of genomic context suggesting  
313 functional conservation. In several *Vibrio* species the CosR homolog was clustered with the  
314 *betIBAprXWV* operon, which is further suggestive of its role in regulation of compatible solute  
315 biosynthesis among *Vibrio* species. Incidentally, in *V. tasmaniensis* LGP32 (formerly *V.*  
316 *splendidus* LGP32) and *Vibrio* MED222, the ectoine gene cluster was present in the same  
317 genome region as the *betIBAprXWV-cosR* cluster.



318 CosR and EctR1 are members of the MarR family of transcriptional regulators, first  
319 characterized in *E. coli*, which are important regulators of a number of cellular responses,  
320 typically responding to a change in the external environment (52-54). The literature suggests that  
321 MarR-type regulators form dimers and bind to a 20-45 bp pseudo-palindromic site in the  
322 intergenic region of genes it controls (52, 55-57). The activity of MarR-type regulators can be  
323 modulated by the presence of a chemical signal, either a ligand, metal ion, or reactive oxygen  
324 species. Binding of these signals causes the protein to undergo a conformational change, thereby  
325 affecting DNA binding capability (52, 58, 59). We modeled a CosR homodimer using SWISS-  
326 MODEL and did not identify a ligand binding pocket. In *V. cholerae*, CosR activity is not  
327 affected by the presence of exogenous compatible solutes including ectoine, glycine betaine and  
328 proline, and *opuD* (*bcct* homolog) transcripts were unchanged in a *cosR* mutant. Hence, the  
329 environmental or cellular signals that modulate the activity of CosR remain unknown, as was  
330 noted by Czech and colleagues (60). Interestingly, our modelling of the EctR regulator identified  
331 in *Aliivibrio* species indicated it also does not have a ligand-binding pocket.

332 Autoregulation was shown for several MarR family regulators, including *ectR1* in *M.*  
333 *alcaliphilum* (49, 52). It was suggested previously that CosR maybe involved in an  
334 autoregulatory feedback loop in *V. cholerae* (18). In *V. parahaemolyticus* we show CosR does  
335 not bind to its own regulatory region, and our reporter assay suggests that CosR does not  
336 autoregulate. It is interesting to note that EctR1 participates in an autoregulatory feedback loop  
337 in *M. alcaliphilum* but not in *M. thalassica* (51, 61).

338 Ectoine biosynthesis is present in all halophilic *Vibrio* species and is essential for growth  
339 in high salt in the absence of compatible solute uptake (13). However, compatible solutes are not  
340 required under low salinity conditions. The physiological role of CosR repression of compatible



341 solute biosynthesis in low salinity is likely to protect levels of key intracellular metabolites such  
342 as glutamate, acetyl-CoA, and oxaloacetate, all of which are affected by ectoine biosynthesis (62,  
343 63).

344         Similar to ectoine biosynthesis gene expression, few direct regulators of glycine betaine  
345 biosynthesis genes have been identified. In *E. coli*, expression of *betIBA* was repressed by BetI  
346 and repression was relieved in the presence of choline (27). BetI was shown to directly regulate  
347 transcription at this locus via DNA binding assays (28). ArcA was shown to repress the *bet*  
348 operon under anaerobic conditions in *E. coli*, although direct binding was not shown (27). In  
349 *Vibrio harveyi*, it was shown that *betIBAprOXWV* were repressed 2- to 3-fold when *betI* was  
350 overexpressed from a plasmid. Purified BetI bound directly to the regulatory region of the  
351 *betIBAprOXWV* operon in DNA binding assays (32, 33). In these studies, it was also shown that  
352 the quorum sensing response regulator LuxR, along with the global regulator IHF, activated  
353 expression of *betIBAprOXWV* (32, 33). Here we have shown that BetI represses its own operon in  
354 *V. parahaemolyticus*, as expected, and we identified a novel regulator of glycine betaine  
355 biosynthesis genes, CosR, which directly represses under low salinity conditions. We also  
356 confirm that, similar to *V. harveyi*, the quorum sensing master regulator OpaR induced  
357 *betIBAprOXWV* expression in *V. parahaemolyticus* and this regulation is direct.

358         Biosynthesis of compatible solutes is an energetically costly process for bacteria (35). *V.*  
359 *parahaemolyticus* does not accumulate compatible solutes in low salinity (12, 13, 29), and  
360 therefore the transcription of biosynthesis and transport genes is unnecessary. CosR represses the  
361 genes involved in the osmotic stress response in *V. parahaemolyticus* in low salinity conditions.  
362 The high conservation of the CosR protein across *Vibrio* species and its genomic context  
363 indicates that regulation by CosR of compatible solute systems is widespread in bacteria.

364 **Materials and Methods:**

365 **Bacterial strains, media and culture conditions.** Listed in Table 1 are all strains and plasmids  
366 used in this study. A previously described streptomycin-resistant clinical isolate of *V.*  
367 *parahaemolyticus*, RIMD2210633, was used as the wild-type strain (64)Makino et al., 2003). *V.*  
368 *parahaemolyticus* strains were grown in either lysogeny broth (LB) (Fisher Scientific, Fair  
369 Lawn, NJ) supplemented with 3% NaCl (wt/vol) (LBS) or in M9 minimal medium (47.8 mM  
370 Na<sub>2</sub>HPO<sub>4</sub>, 22 mM KH<sub>2</sub>PO<sub>4</sub>, 18.7 mM NH<sub>4</sub>Cl, 8.6 mM NaCl) (Sigma-Aldrich, USA)  
371 supplemented with 2 mM MgSO<sub>4</sub>, 0.1 mM CaCl<sub>2</sub>, 20 mM glucose as the sole carbon source  
372 (M9G) and 1% or 3% NaCl (wt/vol) (M9G1%, M9G3%). *E. coli* strains were grown in LB  
373 supplemented with 1% NaCl (wt/vol) or M9G1% where indicated. *E. coli* β2155, a  
374 diaminopimelic acid (DAP) auxotroph, was supplemented with 0.3 mM DAP and grown in LB  
375 1% NaCl. All strains were grown at 37°C with aeration. Antibiotics were used at the following  
376 concentrations (wt/vol) as necessary: ampicillin (Amp), 50 µg/ml; chloramphenicol (Cm), 12.5  
377 µg/ml; tetracycline (Tet), 1 µg/mL; and streptomycin (Str), 200 µg/ml. Choline was added to  
378 media at a final concentration of 1 mM, when indicated.

379 **Construction of the *betI* deletion mutant.** An in-frame *betI* (VPA1114) deletion mutant was  
380 constructed as described previously (17). Briefly, the Gibson assembly protocol, using  
381 NEBuilder HiFi DNA Assembly Master Mix (New England Biolabs, Ipswich, MA), followed  
382 by allelic exchange, was used to generate an in-frame 63-bp truncated, non-functional *betI* gene  
383 (65, 66). Two fragments, AB and CD, were amplified from the RIMD2210633 genome using  
384 primers listed in Table 2. These were ligated with pDS132, which had been digested with SphI,  
385 via Gibson assembly to produce suicide vector pDS132 with a truncated *betI* allele (pDSΔ*betI*).  
386 pDSΔ*betI* was transformed into *E. coli* strain β2155 λ*pir*, followed by conjugation with *V.*

387 *parahaemolyticus*. The suicide vector pDS132 must be incorporated into the *V.*  
388 *parahaemolyticus* genome via homologous recombination, as *V. parahaemolyticus* lacks the *pir*  
389 gene required for replication of the vector. Growth without chloramphenicol induces a second  
390 recombination event which leaves behind either the truncated mutant allele or the wild-type  
391 allele. Colonies were plated on sucrose for selection, as pDS132 harbors a *sacB* gene, which  
392 makes sucrose toxic to cells still carrying the plasmid. Healthy colonies were screened via PCR  
393 and sequenced to confirm an in-frame deletion of the *betI* gene.

394 **RNA isolation and qPCR.** *Vibrio parahaemolyticus* RIMD2210633 and  $\Delta cosR$  were grown  
395 with aeration at 37 °C overnight in LBS. Cells were pelleted, washed twice with 1X PBS, diluted  
396 1:50 into M9G3% or M9G1% and grown with aeration to mid-exponential phase (OD<sub>595</sub> 0.45).  
397 RNA was extracted from 1 mL of culture using Trizol, following the manufacturer's protocol  
398 (Invitrogen, Carlsbad, CA). The samples were treated with Turbo DNase (Invitrogen), followed  
399 by heat inactivation of the enzyme as per manufacturer's protocol. Final RNA concentration was  
400 quantified using a Nanodrop spectrophotometer (Thermo Scientific, Waltham, MA). 500 ng of  
401 RNA were used for cDNA synthesis by priming with random hexamers using SSIV reverse  
402 transcriptase (Invitrogen). Synthesized cDNA was diluted 1:25 and used for quantitative real-  
403 time PCR (qPCR). qPCR experiments were performed using PowerUp SYBR master mix (Life  
404 Technologies, Carlsbad, CA) on an Applied Biosystems QuantStudio6 fast real-time PCR system  
405 (Applied Biosystems, Foster City, CA). Reactions were set up with the following primer pairs  
406 listed in Table 2: VPbcct1Fwd/Rev, VPbcct2Fwd/Rev, VPbcct3Fwd/Rev, VPbcct4Fwd/Rev,  
407 VPectAFwd/Rev, VPasp\_ectFwd/Rev, VPproV1Fwd/Rev, VPAbetIFwd/Rev,  
408 VPAbetBFwd/Rev, VPaproXFwd/Rev, VPaproWFwd/Rev, and 16SFwd/Rev for  
409 normalization. Expression levels were quantified using cycle threshold (CT) and were

410 normalized to 16S rRNA. Differences in gene expression were determined using the  $\Delta\Delta CT$   
411 method (67).

412 **Protein purification of CosR.** CosR was purified as described previously (17). Briefly, full-  
413 length *cosR* (VP1906) was cloned into the protein expression vector pET28a (+) containing an  
414 IPTG-inducible promoter and a C-terminal 6x-His tag (Novagen). Expression of CosR-His was  
415 then induced in *E. coli* BL21 (DE3) with 0.5 mM IPTG at OD<sub>595</sub> of 0.4 and grown overnight at  
416 room temperature. Cells were harvested, resuspended in lysis buffer (50 mM NaPO<sub>4</sub>, 200 mM  
417 NaCl, 20 mM imidazole buffer [pH 7.4]) and lysed using a microfluidizer. CosR-His was bound  
418 to a Ni-NTA column and eluted with 50 mM NaPO<sub>4</sub>, 200 mM NaCl, 500 mM imidazole buffer  
419 [pH 7.4] after a series of washes to remove loosely bound protein. Protein purity was determined  
420 via SDS-PAGE. OpaR was purified as described previously (68).

421 **Electrophoretic Mobility Shift Assay.** Five overlapping DNA fragments, designated *PbetI*  
422 probe A (125-bp), probe B (112-bp), probe C (142-bp), probe D (202-bp) and probe E (158-bp),  
423 were generated from the *betIBAproXWV* regulatory region (includes 36-bp of the coding region  
424 and the 594-bp upstream intergenic region) using primer sets listed in Table 2. Three overlapping  
425 DNA fragments, designated *PbcctI* probe A (120-bp), probe B (110-bp), and probe C (101-bp),  
426 were generated from the *bcctI* regulatory region (includes 15-bp of the coding region and the  
427 276-bp upstream intergenic region) using primer sets listed in Table 2. Two overlapping DNA  
428 fragments, designated *Pbcct3* probe A (108-bp) and probe B (107-bp), were generated from the  
429 *bcct3* regulatory region (includes 17 bp of the coding region and 179-bp of the upstream  
430 intergenic region) using primer sets listed in Table 2. Four overlapping DNA fragments,  
431 designated *PproVI* probe A (160-bp), probe B (134-bp), probe C (108-bp), and probe D (109-

432 bp), were generated from the *proVI* regulatory region (includes 9 bp of the coding region and the  
433 438-bp upstream intergenic region) using primer sets listed in Table 2. Fragments designated  
434 *Pbcct2* (233-bp) and *Pbcct4* (244-bp) were generated from the *bcct2* and *bcct4* regulatory  
435 regions, respectively, using primers listed in Table 2. Two overlapping DNA fragments,  
436 designated *PcosR* probe A (105-bp) and probe B (142-bp), were generated from the *cosR*  
437 regulatory region (includes 4-bp of the coding region and 216 bp of the upstream intergenic  
438 region) using primer sets listed in Table 2. The concentration of purified CosR-His and OpaR  
439 was determined using a Bradford assay. CosR or OpaR was incubated for 20 minutes with 30 ng  
440 of each DNA fragment in a defined binding buffer (10 mM Tris, 150 mM KCl, 0.5 mM  
441 dithiothreitol, 0.1 mM EDTA, 5% polyethylene glycol [PEG] [pH 7.9 at 4°C]). A 6% native  
442 acrylamide gel was pre-run for 2 hours at 4C (200 V) in 1 X TAE buffer. Gels were loaded with  
443 the DNA:protein mixtures (10 µL), and run for 2 hours at 4°C (200 V). Finally, gels were stained  
444 in an ethidium bromide bath for 15 min and imaged.

445 **Reporter Assays.** A GFP reporter assay was conducted using the *E. coli* strain MKH13 (69).  
446 GFP reporter plasmids were constructed as previously described (17). Briefly, each regulatory  
447 region of interest was amplified using primers listed in Table 2 and ligated via Gibson assembly  
448 protocol with the promoterless parent vector pRU1064, which had been digested with SpeI, to  
449 generate reporter plasmids with GFP under the control of the regulatory region of interest.  
450 Complementary regions for Gibson assembly are indicated in lower case letters in the primer  
451 sequence (Table 2). Reporter plasmid *P<sub>betI</sub>-gfp* encompasses 594-bp upstream of the  
452 *betI**BAproXWV* operon. Reporter plasmid *P<sub>bcct1</sub>-gfp* encompasses 278-bp upstream of the *Pbcct1*  
453 regulatory region. Reporter plasmid *P<sub>bcct3</sub>-gfp* encompasses 397-bp upstream of the *Pbcct3*  
454 regulatory region. Reporter plasmid *P<sub>proVI</sub>-gfp* encompasses 438-bp upstream of the *PproVI*

455 regulatory region. Reporter plasmid  $P_{cosR-gfp}$  encompasses 397-bp upstream of the  $P_{cosR}$   
456 regulatory region. The full-length  $cosR$  was then expressed from an IPTG-inducible promoter in  
457 the pBBR1MCS expression vector. Relative fluorescence (RFU) and  $OD_{595}$  were measured;  
458 specific fluorescence was calculated by dividing RFU by  $OD_{595}$ . Strains were grown overnight  
459 with aeration at 37°C in LB1% with ampicillin (50 µg/mL) and chloramphenicol (12.5 µg/mL),  
460 washed twice with 1X PBS, then diluted 1:1000 in M9G1%. Expression of  $cosR$  was induced  
461 with 0.25 mM IPTG, and strains were grown for 20 hours at 37°C with aeration under antibiotic  
462 selection. GFP fluorescence was measured with excitation at 385 and emission at 509 nm in  
463 black, clear-bottom 96-well plates on a Tecan Spark microplate reader with Magellan software  
464 (Tecan Systems Inc., San Jose, CA). Specific fluorescence was calculated for each sampled by  
465 normalizing fluorescence intensity to  $OD_{595}$ . Two biological replicates were performed for each  
466 assay.

467 A GFP reporter assay was conducted in RIMD2210633 wild-type,  $\Delta betI$  and  $\Delta opaR$  mutant  
468 strains. The  $P_{betI-gfp}$  reporter plasmid was transformed into *E. coli*  $\beta 2155 \lambda pir$  and conjugated  
469 into wild-type,  $\Delta betI$  and  $\Delta opaR$  mutant strains. Strains were grown overnight with aeration at  
470 37°C in LB3% with tetracycline (1 µg/mL). Cells were then pelleted, washed two times with 1X  
471 PBS, diluted 1:100 into M9G3% and grown for 20 hours with antibiotic selection. Choline was  
472 added to a final concentration of 1 mM, where indicated. GFP fluorescence was measured with  
473 excitation at 385 and emission at 509 nm in black, clear-bottom 96-well plates on a Tecan Spark  
474 microplate reader with Magellan software (Tecan Systems Inc.). Specific fluorescence was  
475 calculated for each sampled by normalizing fluorescence intensity to  $OD_{595}$ . Two biological  
476 replicates were performed for each assay.

477 **Bioinformatics analysis.** The *V. parahaemolyticus* protein CosR (NP\_798285) was used as a  
478 seed for BLASTp to identify homologs in the *Vibrionaceae* family in the NCBI database.  
479 Sequences of representative strains were downloaded from NCBI and used in a Python-based  
480 program Easyfig to visualize gene arrangements (70). Accession numbers for select strains were:  
481 *V. parahaemolyticus* RIMD (BA00031), *V. crassotreae* 9CS106 (CP016229), *V. splendidus*  
482 BST398 (CP031056), *V. celticus* CECT7224 (NZ\_FLQZ01000088), *V. lentus* 10N.286.51.B9  
483 (NZ\_MCUE01000044), *V. tasmaniensis* LGP32 (FM954973), *V. cyclitrophicus* ECSMB14105  
484 (CO039701), *Aliivibrio fischeri* ES114 (CP000021), *A. fischeri* MJ11 (CP001133), *A. wodanis*  
485 AWOD1 (LN554847), *A. wodanis* 06/09/160 (CP039701). The *V. parahaemolyticus*  
486 RIMD2201633 CosR and *A. fischeri* ES114 EctR protein sequences were retrieved from NCBI  
487 using accession numbers NP\_798285 and AAW88191.1, respectively, and input into the SWISS-  
488 MODEL workspace, which generated a 3D model of a homodimer to identify putative ligand-  
489 binding pockets (71-75).

490 **Acknowledgements:** This research was supported by a National Science Foundation grant  
491 (award IOS-1656688) to E.F.B. G.J.G. was funded in part by a University of Delaware graduate  
492 fellowship award. DPM was supported by a departmental undergraduate researcher fellowship.  
493 We thank members of the Boyd Group for constructive feedback on the manuscript.

- 494 1. Galinski EA. 1995. Osmoadaptation in bacteria. *Adv Microb Physiol* 37:272-328.
- 495 2. Csonka LN. 1989. Physiological and genetic responses of bacteria to osmotic stress.  
496 *Microbiol Rev* 53:121-47.
- 497 3. Wood JM. 2011. Bacterial osmoregulation: a paradigm for the study of cellular  
498 homeostasis. *Annu Rev Microbiol* 65:215-38.
- 499 4. da Costa MS, Santos H, Galinski EA. 1998. An overview of the role and diversity of  
500 compatible solutes in Bacteria and Archaea. *Adv Biochem Eng Biotechnol* 61:117-53.
- 501 5. Galinski EA, Oren A. 1991. Isolation and structure determination of a novel compatible  
502 solute from the moderately halophilic purple sulfur bacterium *Ectothiorhodospira*  
503 *marismortui*. *Eur J Biochem* 198:593-598.
- 504 6. Sleator RD, Hill C. 2002. Bacterial osmoadaptation: the role of osmolytes in bacterial  
505 stress and virulence. *FEMS Microbiol Rev* 26:49-71.
- 506 7. Roberts MF. 2004. Osmoadaptation and osmoregulation in archaea: update 2004. *Front*  
507 *Biosci* 9:1999-2019.
- 508 8. Roberts MF. 2005. Organic compatible solutes of halotolerant and halophilic  
509 microorganisms. *Saline Systems* 1:5.
- 510 9. Kempf B, Bremer E. 1998. Uptake and synthesis of compatible solutes as microbial stress  
511 responses to high-osmolality environments. *Arch Microbiol* 170:319-30.
- 512 10. Record MT, Jr., Courtenay ES, Cayley DS, Guttman HJ. 1998. Responses of *E. coli* to  
513 osmotic stress: large changes in amounts of cytoplasmic solutes and water. *Trends*  
514 *Biochem Sci* 23:143-8.
- 515 11. Wood JM. 1999. Osmosensing by bacteria: signals and membrane-based sensors.  
516 *Microbiol Mol Biol Rev* 63:230-62.



- 517 12. Naughton LM, Blumerman SL, Carlberg M, Boyd EF. 2009. Osmoadaptation among  
518 *Vibrio* species and unique genomic features and physiological responses of *Vibrio*  
519 *parahaemolyticus*. *Appl Environ Microbiol* 75:2802-10.
- 520 13. Ongagna-Yhombi SY, Boyd EF. 2013. Biosynthesis of the osmoprotectant ectoine, but  
521 not glycine betaine, is critical for survival of osmotically stressed *Vibrio*  
522 *parahaemolyticus* cells. *Appl Environ Microbiol* 79:5038-49.
- 523 14. Louis P, Galinski EA. 1997. Characterization of genes for the biosynthesis of the  
524 compatible solute ectoine from *Marinococcus halophilus* and osmoregulated expression  
525 in *Escherichia coli*. *Microbiology* 143 ( Pt 4):1141-9.
- 526 15. Lo CC, Bonner CA, Xie G, D'Souza M, Jensen RA. 2009. Cohesion group approach for  
527 evolutionary analysis of aspartokinase, an enzyme that feeds a branched network of many  
528 biochemical pathways, p 594-651, *Microbiol Mol Biol Rev*, vol 73.
- 529 16. Widderich N, Hoppner A, Pittelkow M, Heider J, Smits SH, Bremer E. 2014.  
530 Biochemical properties of ectoine hydroxylases from extremophiles and their wider  
531 taxonomic distribution among microorganisms. *PLoS One* 9:e93809.
- 532 17. Gregory GJ, Morreale DP, Carpenter MR, Kalburge SS, Boyd EF. 2019. Quorum sensing  
533 regulators AphA and OpaR control expression of the compatible solute ectoine  
534 biosynthesis operon. *Appl Environ Microbiol* 85.
- 535 18. Shikuma NJ, Davis KR, Fong JN, Yildiz FH. 2013. The transcriptional regulator, CosR,  
536 controls compatible solute biosynthesis and transport, motility and biofilm formation in  
537 *Vibrio cholerae*. *Environ Microbiol* 15:1387-99.

- 538 19. Roberts MF, Lai MC, Gunsalus RP. 1992. Biosynthetic pathways of the osmolytes N  
539 epsilon-acetyl-beta-lysine, beta-glutamine, and betaine in *Methanohalophilus* strain FDF1  
540 suggested by nuclear magnetic resonance analyses. *J Bacteriol* 174:6688-93.
- 541 20. Lai MC, Yang DR, Chuang MJ. 1999. Regulatory factors associated with synthesis of the  
542 osmolyte glycine betaine in the halophilic methanoarchaeon *Methanohalophilus*  
543 *portucalensis*. *Appl Environ Microbiol* 65:828-33.
- 544 21. Nyssölä A, Kerovuo J, Kaukinen P, Weymarn Nv, Reinikainen T. 2000. Extreme  
545 Halophiles Synthesize Betaine from Glycine by Methylation. *J Biol Chem.* 275:22196-  
546 201.
- 547 22. Waditee R, Tanaka Y, Aoki K, Hibino T, Jikuya H, Takano J, Takabe T. 2003. Isolation  
548 and functional characterization of N-methyltransferases that catalyze betaine synthesis  
549 from glycine in a halotolerant photosynthetic organism *Aphanothece halophytica*. *J Biol*  
550 *Chem* 278:4932-42.
- 551 23. Lu WD, Chi ZM, Su CD. 2006. Identification of glycine betaine as compatible solute in  
552 *Synechococcus* sp. WH8102 and characterization of its N-methyltransferase genes  
553 involved in betaine synthesis. *Arch Microbiol* 186:495-506.
- 554 24. Kimura Y, Kawasaki S, Yoshimoto H, Takegawa K. 2010. Glycine betaine  
555 biosynthesized from glycine provides an osmolyte for cell growth and spore germination  
556 during osmotic stress in *Myxococcus xanthus*. *J Bacteriol* 192:1467-70.
- 557 25. Landfald B, Strom AR. 1986. Choline-glycine betaine pathway confers a high level of  
558 osmotic tolerance in *Escherichia coli*. *J Bacteriol* 165:849-55.

- 559 26. Andresen PA, Kaasen I, Styrvold OB, Boulnois G, Strom AR. 1988. Molecular cloning,  
560 physical mapping and expression of the bet genes governing the osmoregulatory choline-  
561 glycine betaine pathway of *Escherichia coli*. *J Gen Microbiol* 134:1737-46.
- 562 27. Lamark T, Rokenes TP, McDougall J, Strom AR. 1996. The complex bet promoters of  
563 *Escherichia coli*: regulation by oxygen (ArcA), choline (BetI), and osmotic stress. *J*  
564 *Bacteriol* 178:1655-62.
- 565 28. Rokenes TP, Lamark T, Strom AR. 1996. DNA-binding properties of the BetI repressor  
566 protein of *Escherichia coli*: the inducer choline stimulates BetI-DNA complex formation.  
567 *J Bacteriol* 178:1663-70.
- 568 29. Ongagna-Yhombi SY, McDonald ND, Boyd EF. 2015. Deciphering the role of multiple  
569 betaine-carnitine-choline transporters in the Halophile *Vibrio parahaemolyticus*. *Appl*  
570 *Environ Microbiol* 81:351-63.
- 571 30. Eshoo MW. 1988. lac fusion analysis of the bet genes of *Escherichia coli*: regulation by  
572 osmolarity, temperature, oxygen, choline, and glycine betaine. *J Bacteriol* 170:5208-15.
- 573 31. Scholz A, Stahl J, de Berardinis V, Muller V, Averhoff B. 2016. Osmotic stress response  
574 in *Acinetobacter baylyi*: identification of a glycine-betaine biosynthesis pathway and  
575 regulation of osmoadaptive choline uptake and glycine-betaine synthesis through a  
576 choline-responsive BetI repressor. *Environ Microbiol Rep* 8:316-22.
- 577 32. van Kessel JC, Rutherford ST, Cong JP, Quinodoz S, Healy J, Bassler BL. 2015. Quorum  
578 sensing regulates the osmotic stress response in *Vibrio harveyi*. *J Bacteriol* 197:73-80.
- 579 33. Chaparian RR, Olney SG, Hustmyer CM, Rowe-Magnus DA, van Kessel JC. 2016.  
580 Integration host factor and LuxR synergistically bind DNA to coactivate quorum-sensing  
581 genes in *Vibrio harveyi*. *Mol Microbiol* 101:823-40.

- 582 34. Ventosa A, Nieto JJ, Oren A. 1998. Biology of Moderately Halophilic Aerobic Bacteria.  
583 Microbiol Mol Biol Rev 62:504-44.
- 584 35. Oren A. 1999. Bioenergetic aspects of halophilism. Microbiol Mol Biol Rev 63:334-48.
- 585 36. Wood JM. 2007. Bacterial osmosensing transporters. Methods Enzymol 428:77-107.
- 586 37. Culham DE, Henderson J, Crane RA, Wood JM. 2003. Osmosensor ProP of Escherichia  
587 coli Responds to the Concentration, Chemistry, and Molecular Size of Osmolytes in the  
588 Proteoliposome Lumen. Biochemistry, 42(2):410-20.
- 589 38. Rübenhagen R, Morbach S, Krämer R. 2001. The osmoreactive betaine carrier BetP from  
590 Corynebacterium glutamicum is a sensor for cytoplasmic K<sup>+</sup>. EMBO J, 20: 5412-20.
- 591 39. van der Heide T, Stuart MC, Poolman B. 2001. On the osmotic signal and osmosensing  
592 mechanism of an ABC transport system for glycine betaine. EMBO J, 20:7022-32,.
- 593 40. Cairney J, Booth IR, Higgins CF. 1985. Osmoregulation of gene expression in  
594 Salmonella typhimurium: proU encodes an osmotically induced betaine transport system.  
595 J Bacteriol 164:1224-32.
- 596 41. May G, Faatz E, Villarejo M, Bremer E. 1986. Binding protein dependent transport of  
597 glycine betaine and its osmotic regulation in Escherichia coli K12. Mol Gen Genet  
598 205:225-33.
- 599 42. Kempf B, Bremer E. 1995. OpuA, an osmotically regulated binding protein-dependent  
600 transport system for the osmoprotectant glycine betaine in Bacillus subtilis. J Biol Chem  
601 270:16701-13.
- 602 43. Mahmood NA, Biemans-Oldehinkel E, Patzlaff JS, Schuurman-Wolters GK, Poolman B.  
603 2006. Ion specificity and ionic strength dependence of the osmoregulatory ABC  
604 transporter OpuA. J Biol Chem 281:29830-9.

- 605 44. Chen C, Beattie GA. 2007. Characterization of the osmoprotectant transporter OpuC  
606 from *Pseudomonas syringae* and demonstration that cystathionine-beta-synthase domains  
607 are required for its osmoregulatory function. *J Bacteriol* 189:6901-12.
- 608 45. Lucht JM, Bremer E. 1994. Adaptation of *Escherichia coli* to high osmolarity  
609 environments: osmoregulation of the high-affinity glycine betaine transport system proU.  
610 *FEMS Microbiol Rev* 14:3-20.
- 611 46. Gul N, Poolman B. 2013. Functional reconstitution and osmoregulatory properties of the  
612 ProU ABC transporter from *Escherichia coli*. *Mol Membr Biol* 30:138-48.
- 613 47. Lamark T, Kaasen I, Eshoo MW, Falkenberg P, McDougall J, Strom AR. 1991. DNA  
614 sequence and analysis of the bet genes encoding the osmoregulatory choline-glycine  
615 betaine pathway of *Escherichia coli*. *Mol Microbiol* 5:1049-64.
- 616 48. Ziegler C, Bremer E, Kramer R. 2010. The BCCT family of carriers: from physiology to  
617 crystal structure. *Mol Microbiol* 78:13-34.
- 618 49. Mustakhimov, II, Reshetnikov AS, Glukhov AS, Khmelenina VN, Kalyuzhnaya MG,  
619 Trotsenko YA. 2010. Identification and characterization of EctR1, a new transcriptional  
620 regulator of the ectoine biosynthesis genes in the halotolerant methanotroph  
621 *Methylophilum alcaliphilum* 20Z. *J Bacteriol* 192:410-7.
- 622 50. Mustakhimov, II, Reshetnikov AS, Khmelenina VN, Trotsenko YA. 2009. EctR--a novel  
623 transcriptional regulator of ectoine biosynthesis genes in the haloalcaliphilic  
624 methylotrophic bacterium *Methylophaga alcalica*. *Dokl Biochem Biophys* 429:305-8.
- 625 51. Mustakhimov, II, Reshetnikov AS, Fedorov DN, Khmelenina VN, Trotsenko YA. 2012.  
626 Role of EctR as transcriptional regulator of ectoine biosynthesis genes in *Methylophaga*  
627 *thalassica*. *Biochemistry (Mosc)* 77:857-63.

- 628 52. Perera IC, Grove A. 2010. Molecular mechanisms of ligand-mediated attenuation of  
629 DNA binding by MarR family transcriptional regulators. *J Mol Cell Biol* 2:243-54.
- 630 53. Sulavik MC, Gambino LF, Miller PF. 1995. The MarR repressor of the multiple  
631 antibiotic resistance (mar) operon in *Escherichia coli*: prototypic member of a family of  
632 bacterial regulatory proteins involved in sensing phenolic compounds. *Mol Med* 1:436-  
633 46.
- 634 54. Cohen SP, Hachler H, Levy SB. 1993. Genetic and functional analysis of the multiple  
635 antibiotic resistance (mar) locus in *Escherichia coli*. *J Bacteriol* 175:1484-92.
- 636 55. Hong M, Fuangthong M, Helmann JD, Brennan RG. 2005. Structure of an OhrR-ohrA  
637 operator complex reveals the DNA binding mechanism of the MarR family. *Mol Cell*  
638 20:131-41.
- 639 56. Kumarevel T, Tanaka T, Umehara T, Yokoyama S. 2009. ST1710-DNA complex crystal  
640 structure reveals the DNA binding mechanism of the MarR family of regulators. *Nucleic*  
641 *Acids Res* 37:4723-35.
- 642 57. Dolan KT, Duguid EM, He C. 2011. Crystal structures of SlyA protein, a master  
643 virulence regulator of *Salmonella*, in free and DNA-bound states. *J Biol Chem*  
644 286:22178-85.
- 645 58. Hao Z, Lou H, Zhu R, Zhu J, Zhang D, Zhao BS, Zeng S, Chen X, Chan J, He C, Chen  
646 PR. 2014. The multiple antibiotic resistance regulator MarR is a copper sensor in  
647 *Escherichia coli*. *Nat Chem Biol* 10:21-8.
- 648 59. Deochand DK, Grove A. 2017. MarR family transcription factors: dynamic variations on  
649 a common scaffold. *Crit Rev Biochem Mol Biol* 52:595-613.

- 650 60. Czech L, Hermann L, Stoveken N, Richter AA, Hoppner A, Smits SHJ, Heider J, Bremer  
651 E. 2018. Role of the Extremolytes Ectoine and Hydroxyectoine as Stress Protectants and  
652 Nutrients: Genetics, Phylogenomics, Biochemistry, and Structural Analysis. *Genes*  
653 (Basel) (4). pii: E177.
- 654 61. Reshetnikov AS, Khmelenina VN, Mustakhimov, II, Kalyuzhnaya M, Lidstrom M,  
655 Trotsenko YA. 2011. Diversity and phylogeny of the ectoine biosynthesis genes in  
656 aerobic, moderately halophilic methylotrophic bacteria. *Extremophiles* 15:653-63.
- 657 62. Shao Z, Deng W, Li S, He J, Ren S, Huang W, Lu Y, Zhao G, Cai Z, Wang J. 2015.  
658 GlnR-Mediated Regulation of ectABCD Transcription Expands the Role of the GlnR  
659 Regulon to Osmotic Stress Management. *J Bacteriol* 197:3041-7.
- 660 63. Pastor JM, Bernal V, Salvador M, Argandona M, Vargas C, Csonka L, Sevilla A, Iborra  
661 JL, Nieto JJ, Canovas M. 2013. Role of central metabolism in the osmoadaptation of the  
662 halophilic bacterium *Chromohalobacter salexigens*. *J Biol Chem* 288:17769-81.
- 663 64. Whitaker WB, Parent MA, Naughton LM, Richards GP, Blumerman SL, Boyd EF. 2010.  
664 Modulation of responses of *Vibrio parahaemolyticus* O3:K6 to pH and temperature  
665 stresses by growth at different salt concentrations. *Appl Environ Microbiol* 76:4720-9.
- 666 65. Horton RM HH, Ho SN, Pullen JK, Pease LR. 1989. Engineering hybrid genes without  
667 the use of restriction enzymes: gene splicing by overlap extension. *Gene* 77:61-68.
- 668 66. Gibson DG. 2011. Enzymatic assembly of overlapping DNA fragments. *Methods*  
669 *Enzymol* 498:349-61.
- 670 67. Pfaffl MW. 2001. A new mathematical model for relative quantification in real-time RT-  
671 PCR. *Nucleic Acids Res* 29:e45.

- 672 68. Kalburge SS, Carpenter MR, Rozovsky S, Boyd EF. 2017. Quorum Sensing Regulators  
673 Are Required for Metabolic Fitness in *Vibrio parahaemolyticus*. *Infect Immun*  
674 85:e00930-16.
- 675 69. Haardt M, Kempf B, Faatz E, Bremer E. 1995. The osmoprotectant proline betaine is a  
676 major substrate for the binding-protein-dependent transport system ProU of *Escherichia*  
677 *coli* K-12. *Mol Gen Genet* 246:783-6.
- 678 70. Sullivan MJ, Petty NK, Beatson SA. 2011. Easyfig: a genome comparison visualizer.  
679 *Bioinformatics* 27:1009-10.
- 680 71. Waterhouse A, Bertoni M, Bienert S, Studer G, Tauriello G, Gumienny R, Heer FT, de  
681 Beer TAP, Rempfer C, Bordoli L, Lepore R, Schwede T. 2018. SWISS-MODEL:  
682 homology modelling of protein structures and complexes. *Nucleic Acids Res* 46:W296-  
683 w303.
- 684 72. Guex N, Peitsch MC, Schwede T. 2009. Automated comparative protein structure  
685 modeling with SWISS-MODEL and Swiss-PdbViewer: a historical perspective.  
686 *Electrophoresis* 30 Suppl 1:S162-73.
- 687 73. Bienert S, Waterhouse A, de Beer TA, Tauriello G, Studer G, Bordoli L, Schwede T.  
688 2017. The SWISS-MODEL Repository-new features and functionality. *Nucleic Acids*  
689 *Res* 45:D313-d319.
- 690 74. Benkert P, Biasini M, Schwede T. 2011. Toward the estimation of the absolute quality of  
691 individual protein structure models. *Bioinformatics* 27:343-50.
- 692 75. Bertoni M, Kiefer F, Biasini M, Bordoli L, Schwede T. 2017. Modeling protein  
693 quaternary structure of homo- and hetero-oligomers beyond binary interactions by  
694 homology. *Sci Rep* 7:10480.



- 695 76. Makino K, Oshima K, Kurokawa K, Yokoyama K, Uda T, Tagomori K, Iijima Y, Najima  
696 M, Nakano M, Yamashita A, Kubota Y, Kimura S, Yasunaga T, Honda T, Shinagawa H,  
697 Hattori M, Iida T. 2003. Genome sequence of *Vibrio parahaemolyticus*: a pathogenic  
698 mechanism distinct from that of *V. cholerae*. *Lancet* 361:743-9.
- 699 77. Dehio C, Meyer M. 1997. Maintenance of broad-host-range incompatibility group P and  
700 group Q plasmids and transposition of Tn5 in *Bartonella henselae* following conjugal  
701 plasmid transfer from *Escherichia coli*. *J Bacteriol* 179:538-40.
- 702 78. Philippe N, Alcaraz JP, Coursange E, Geiselmann J, Schneider D. 2004. Improvement of  
703 pCVD442, a suicide plasmid for gene allele exchange in bacteria. *Plasmid* 51:246-55.
- 704 79. Kovach ME, Phillips RW, Elzer PH, Roop RM, 2nd, Peterson KM. 1994. pBBR1MCS: a  
705 broad-host-range cloning vector. *Biotechniques* 16:800-2.
- 706 80. Karunakaran R, Mauchline TH, Hosie AH, Poole PS. 2005. A family of promoter probe  
707 vectors incorporating autofluorescent and chromogenic reporter proteins for studying  
708 gene expression in Gram-negative bacteria. *Microbiology* 151:3249-56.

709

710 **Table 1. Strains and Plasmids**

| Strain                     | Genotype or description                                                                                             | Reference or Source     |
|----------------------------|---------------------------------------------------------------------------------------------------------------------|-------------------------|
| <i>Vibrio</i>              |                                                                                                                     |                         |
| <i>parahaemolyticus</i>    |                                                                                                                     |                         |
| RIMD2210633                | O3:K6 clinical isolate, Str <sup>r</sup>                                                                            | (64, 76)                |
| $\Delta cosR$              | RIMD2210633 $\Delta cosR$ (VP1906), Str <sup>r</sup>                                                                | (17)                    |
| $\Delta betI$              | RIMD2210633 $\Delta betI$ (VPA1114), Str <sup>r</sup>                                                               | This study              |
| SSK2516 ( $\Delta opaR$ )  | RIMD2210633 $\Delta opaR$ (VP2516), Str <sup>r</sup> Str <sup>R</sup>                                               | (68)                    |
| <i>Escherichia coli</i>    |                                                                                                                     |                         |
| DH5 $\alpha$ $\lambda pir$ | $\Delta lac pir$                                                                                                    | ThermoFisher Scientific |
| $\beta$ 2155 $\lambda pir$ | $\Delta dapA::erm pir$ for bacterial conjugation                                                                    | (77)                    |
| BL21(DE3)                  | Expression strain                                                                                                   | ThermoFisher Scientific |
| MKH13                      | MC4100 ( $\Delta betTIBA$ ) $\Delta (putPA)101$<br>$\Delta (proP)2 \Delta (proU)$ ; Sp <sup>r</sup>                 | (69)                    |
| <b>Plasmids</b>            |                                                                                                                     |                         |
| pDS132                     | Suicide plasmid; Cm <sup>R</sup> Cm <sup>r</sup> ; SacB                                                             | (78)                    |
| pBBR1MCS                   | Expression vector; <i>lacZ</i> promoter; Cm <sup>r</sup> Cm <sup>R</sup>                                            | (79)                    |
| pBBR <i>cosR</i>           | pBBR1MCS harboring full-length <i>cosR</i><br>(VP1906)                                                              | (17)                    |
| pRU1064                    | promoterless- <i>gfpUV</i> , Amp <sup>R</sup> Amp <sup>r</sup> , Tet <sup>R</sup> Tet <sup>r</sup> ,<br>IncP origin | (80)                    |
| pRU <i>PectA</i>           | pRU1064 with <i>PectA-gfp</i> , Amp <sup>r</sup> , Tet <sup>r</sup> Amp <sup>R</sup> ,<br>Tet <sup>R</sup>          | (17)                    |
| pRUP <i>betI</i>           | pRU1064 with <i>PbetI-gfp</i> , Amp <sup>r</sup> , Tet <sup>r</sup> Amp <sup>R</sup> ,<br>Tet <sup>R</sup>          | This study              |
| pRUP <i>bcct1</i>          | pRU1064 with <i>Pbcct1-gfp</i> , Amp <sup>r</sup> , Tet <sup>r</sup> Amp <sup>R</sup> ,<br>Tet <sup>R</sup>         | This study              |
| pRUP <i>bcct3</i>          | pRU1064 with <i>Pbcct3-gfp</i> , Amp <sup>r</sup> , Tet <sup>r</sup> Amp <sup>R</sup> ,<br>Tet <sup>R</sup>         | This study              |
| pRUP <i>proVI</i>          | pRU1064 with <i>PproV-gfp</i> , Amp <sup>r</sup> , Tet <sup>r</sup> Amp <sup>R</sup> ,<br>Tet <sup>R</sup>          | This study              |
| pRUP <i>cosR</i>           | pRU1064 with <i>PcosR-gfp</i> , Amp <sup>r</sup> , Tet <sup>r</sup> Amp <sup>R</sup> ,<br>Tet <sup>R</sup>          | (17)                    |
| pET28a+                    | Expression vector, 6xHis; Kan <sup>R</sup> Kan <sup>r</sup>                                                         | Novagen                 |
| pET <i>cosR</i>            | Pet28a+ harboring <i>cosR</i> , Kan <sup>R</sup> Kan <sup>r</sup>                                                   | (17)                    |

711

712

713 **Table 2. Primers used in this study**

| Use               | Sequence (5'-3')                           | bp   |
|-------------------|--------------------------------------------|------|
| <b>Mutant</b>     |                                            |      |
| VPbetIA           | gcttcttagaggtaccgcatgcGCCAGTTTTATGTGCTCACC | 580  |
| VPbetIB           | atatttatgagaCATCCCCACCTTTGGCATTTTG         |      |
| VPbetIC           | gatgcctgaaCTCGACAAGCAGCTAACG               | 688  |
| VPbetID           | ggagagctcgatatgcatgcTCTGCCCTACCCGGTAATC    |      |
| VPbetIFL Fwd      | AGCATAGCACATAAGAGTCG                       | 1895 |
| VPbetIFL Rev      | CCTGATTCGCCAGTGAACGA                       |      |
| <b>EMSA</b>       |                                            |      |
| VPbetIFwdA        | CGGTTTTCTGATTCAGGC                         | 125  |
| VPbetIRevA        | CTTTTAATGATAAATCGTTTGAGTTCG                |      |
| VPbetIFwdB        | ATGCCAAAAATTTAGTTCGAAC                     | 112  |
| VPbetIRevB        | GGTCTTTGAATGGATGGTAGGG                     |      |
| VPbetIFwdC        | CCCTACCATCCATTCAAAGACC                     | 142  |
| VPbetIRevC        | CTAAGGCTTCTACATTGCTTTC                     |      |
| VPbetIFwdD        | GAAAGCAATGTAGAAGCCTTAG                     | 202  |
| VPbetIRevD        | GAACTTGGATATGCGTCCATT                      |      |
| VPbetIFwdE        | AATGGACGCATATCCAAGTTC                      | 158  |
| VPbetIRevE        | AGCATAGCACATAAGAGTCG                       |      |
| VPbcct1FwdA       | ACCGCAAACCTCCCGATC                         | 120  |
| VPbcct1RevA       | CGGTATTCAGTACAAAAGAA                       |      |
| VPbcct1FwdB       | TTCTTTTGTACTGAATACCG                       | 110  |
| VPbcct1RevB       | TGTCTTCAACTCACAGAAT                        |      |
| VPbcct1FwdC       | ATTCTTGTGAGTTGAAGACA                       | 101  |
| VPbcct1RevC       | AGCGAATTTTATCACCAATCACA                    |      |
| VPbcct3FwdA       | CGCTTTTTGTAATGCAAATTACC                    | 107  |
| VPbcct3RevA       | CCCGTGAAAGCGGAAGATC                        |      |
| VPbcct3FwdB       | GATCTTCCGCTTTCACGGG                        | 108  |
| VPbcct3RevB       | TCTATACCCTTTGTCATCGTTCCCTC                 |      |
| VPcosRFwdA        | CAAATCTCCACACCATTAATTAG                    | 105  |
| VPcosRRevA        | CGTCTTTGGTGATTTCTTTTTATTTCG                |      |
| VPcosRFwdB        | GCGAATAAAAAGAAATCACCAAAGACG                | 142  |
| VPcosRRevB        | CCAATTTTTTTCATCCAGTCTGTAGGG                |      |
| VPproU1FwdA       | TCTTTATTCCATGCGTTG                         | 160  |
| VPproU1RevA       | AGAGGCAGAAAGAACAGTGAA                      |      |
| VPproU1FwdB       | TTCACTGTTCTTTCTGCCTCT                      | 134  |
| VPproU1RevB       | GGTTATGAATGTGTTTCGTTTGT                    |      |
| VPproU1FwdC       | ACAAACGAACACATTCATAACC                     | 108  |
| VPproU1RevC       | TGGCTTGGCTTATTGGTGTTTC                     |      |
| VPproU1FwdD       | GAACACCAATAAGCCAAGCCA                      | 109  |
| VPproU1RevD       | GGGATCCATGTTAATTGTCTTTG                    |      |
| VPbcct2Fwd        | ACCGAGACATGCCAATTTCTG                      | 233  |
| VPbcct2Rev        | CGGTGCTCACGAATAATCTCC                      |      |
| VPbcct4Fwd        | AGAACAGGTTGGCTCAATGT                       | 244  |
| VPbcct4Rev        | TTCCCCTCACATCAAGTCG                        |      |
| <b>Expression</b> |                                            |      |
| PbetIFwd          | TCTAAGCTTGCATAGCACATAAGAGTCGC              | 594  |
| PbetIRev          | TATACTAGTTTTGCGTCCTTGTTATTTTTAATTG         |      |
| Pbcct1Fwd         | tagatagagagagagagaAAACCGCAAACCTCCCGATC     | 278  |

|                       |                                                    |     |
|-----------------------|----------------------------------------------------|-----|
| Pbcct1Rev             | actcatttttctctccaCAATCACAAATTTATGCAAAAATGAC        |     |
| Pbcct3Fwd             | tagatagagagagagagagaAATTTTTTCATCCAGTCTGTAGG        | 397 |
| Pbcct3Rev             | actcatttttctctccaCGTTCCTCTCTATTTTTGTATTATTTTTTC    |     |
| PproU1Fwd             | tagatagagagagagagagaTCTTTATCCATGCGTTG              | 438 |
| PproU1Rev             | actcatttttctctccaGTTAATTGTCCTTTGTTATGTG            |     |
| PcosRFwd              | tagatagagagagagagagaCGTTCCTCTCTATTTTTGTATTATTTTTTC | 397 |
| PcosRRev              | cggccgctctagaactagtgTTATTCTGGTTTGGTGATG            |     |
| <b>RT-PCR primers</b> |                                                    |     |
| VPbcct1Fwd            | GTTCGGTCTTGCGACTTCTC                               | 246 |
| VPbcct1Rev            | CCCATCGCAGTATCAAAGGT                               |     |
| VPbcct2Fwd            | AACAAAGGGTTGCCACTGAC                               | 167 |
| VPbcct2Rev            | TTCAAACCTGTTGCTGCTTG                               |     |
| VPbcct3Fwd            | TGGACGGTATTCTACTGGGC                               | 202 |
| VPbcct3Rev            | CGCCTAACTCGCCTACTTTG                               |     |
| VPectAFwd             | TCGAAAGGGAAGCGCTGAG                                | 125 |
| VPectARev             | AGTGCTGACTTGGCCATGAT                               |     |
| VPasp_ectFwd          | CGATGATTCCATTCGCGACG                               | 126 |
| VPasp_ectRev          | GTCATCTCACTGTAGCCCCG                               |     |
| VPproV1Fwd            | GCATCGTTTCTCTCGACTCC                               | 163 |
| VPproV1Rev            | TGCTCATCGACTACTGGCAC                               |     |
| VPAbcct4Fwd           | CAAGGCGTAGGCCGCATGGT                               | 234 |
| VPAbcct4Rev           | ACCGCCCACGATGCTGAACC                               |     |
| VPAbetIFwd            | ACTTCGGTGGTAAGCATGGG                               | 138 |
| VPAbetIRev            | TGCCGTCAATAATGGCGTTG                               |     |
| VPAbetBFwd            | TGGAAATCAGCACCAGCACT                               | 160 |
| VPAbetBRev            | TCTGCCCTACCCGGTAATCA                               |     |
| VPaproXFwd            | TTCCTTGGTAACTGGATGCC                               | 216 |
| VPaproXRev            | ATCGTTACCTGGTTTCGATGC                              |     |
| VPaproWFwd            | ATCACAGCGGCACTGGCTTGG                              | 190 |
| VPaproWRev            | GGCGATGCGCTGCCATGATC                               |     |
| 16SFwd                | ACCGCCTGGGGAGTACGGTC                               | 234 |
| 16SRev                | TTGCGCTCGTTGCGGGACTT                               |     |

714

715

716

717

718

719

720

721

722

723 **Figure legends**

724 **Figure 1.** RNA was isolated from RIMD2210633 after growth in M9G1% and M9G3% at an  
725 OD<sub>595</sub> of 0.45. Expression analysis of (A) *ectA*, *asp\_ect*, (B) *betI*, *betB*, *proX2*, *proW2* (C) *bcct1*,  
726 *bcct2*, *bcct3*, *bcct4* and *proVI* by quantitative real time PCR (qPCR). 16S was used for  
727 normalization. Expression levels shown are levels in M9G1% relative to M9G3%. Mean and  
728 standard error of two biological replicates are shown. Statistics were calculated using a Student's  
729 t-test (\*, P < 0.05; \*\*, P < 0.01; \*\*\*, P < 0.001).

730 **Figure 2.** RNA was isolated from RIMD2210633 and  $\Delta$ *cosR* after growth in M9G1% at an  
731 OD<sub>595</sub> of 0.45. Expression analysis of (A) *ectA*, *asp\_ect*, (B) *betI*, *betB*, *proX2*, *proW2* (C) *bcct1*,  
732 *bcct2*, *bcct3*, *bcct4* and *proVI* by qPCR. 16S was used for normalization. Expression levels  
733 shown are levels in  $\Delta$ *cosR* relative to wild-type. Mean and standard error of two biological  
734 replicates are shown. Statistics were calculated using a Student's t-test (\*, P < 0.05; \*\*, P <  
735 0.01).

736 **Figure 3.** (A) The regulatory region of *betI**B**A**proXWV* was divided into five probes for EMSAs,  
737 *PbetI* A-E, 125-bp, 112-bp, 142-bp, 202-bp and 158-bp, respectively. The regulatory region used  
738 for the GFP reporter assay is indicated with a bracket. (B) An EMSA was performed with  
739 purified CosR-His (0 to 0.62  $\mu$ M) and 30 ng of each *PbetI* probe, with DNA:protein molar ratios  
740 of 1:0, 1:1, 1:5, and 1:10. (C) A *P<sub>betI</sub>-gfp* reporter assay was performed in *E. coli* strain MKH13  
741 containing an expression plasmid with full-length *cosR* (*pcosR*). Specific fluorescence of the  
742 CosR-expressing strain was compared to a strain harboring empty expression vector. Mean and  
743 standard deviation of two biological replicates are shown. Statistics were calculated using a  
744 Student's t-test (\*\*\*, P < 0.001).

745 **Figure 4. (A)** The regulatory region of *bcct1* was divided into three similarly sized probes for  
746 EMSAs, *Pbcct1* A-C, 120-bp, 110-bp, and 101-bp, respectively. The regulatory region used for  
747 the GFP reporter assay is indicated with a bracket. **(B)** An EMSA was performed with purified  
748 CosR-His (0 to 0.69  $\mu$ M) and 30 ng of *Pbcct1* probe with DNA:protein molar ratios of 1:0, 1:1,  
749 1:5, and 1:10. **(C)** A *P<sub>bcct1</sub>-gfp* reporter assay was performed in *E. coli* strain MKH13 containing  
750 an expression plasmid with full-length *cosR* (*pcosR*). Specific fluorescence of the CosR-  
751 expressing strain was compared to a strain harboring empty expression vector (pBBR1MCS).  
752 Mean and standard deviation of two biological replicates are shown. Statistics were calculated  
753 using a Student's t-test (\*\*,  $P < 0.01$ ).

754 **Figure 5. (A)** A 196-bp portion of the regulatory region of *bcct3* was split into two probes for  
755 EMSAs, *Pbcct3* A and B, 108-bp and 107-bp, respectively. The regulatory region used for the  
756 GFP reporter assay is indicated with a bracket. **(B)** An EMSA was performed with purified  
757 CosR-His (0 to 0.65  $\mu$ M) and 30 ng of *Pbcct3* probe with DNA:protein molar ratios of 1:0, 1:1,  
758 1:5, and 1:10. **(C)** *P<sub>bcct3</sub>-gfp* reporter assay was performed in *E. coli* strain MKH13 containing an  
759 expression plasmid with full-length *cosR* (*pcosR*). Specific fluorescence of the CosR-expressing  
760 strain was compared to a strain harboring empty expression vector (pBBR1MCS). Mean and  
761 standard deviation of two biological replicates are shown. Statistics were calculated using a  
762 Student's t-test (\*\*,  $P < 0.01$ ). **(D)** An EMSA was performed with CosR-His (0 to 0.18  $\mu$ M) and  
763 probes of the regulatory regions of *bcct2* and *bcct4*. Each lane contains 30 ng of DNA and  
764 DNA:protein molar ratios of 1:0, 1:1, 1:5, and 1:10.

765 **Figure 6. (A)** The 447-bp regulatory region of the *proVI* gene was divided into four probes for  
766 EMSAs, *PproVI* A-D, 160-bp, 134-bp, 108-bp and 109-bp, respectively. The regulatory region  
767 used for the GFP reporter assay is indicated with a bracket. **(B)** An EMSA was performed with

768 purified CosR-His (0 to 0.64  $\mu$ M) and 30 ng of each *P<sub>proVI</sub>* probe with DNA:protein molar  
769 ratios of 1:0, 1:1, 1:5, and 1:10. (C) A reporter assay was conducted in *E. coli* MKH13 harboring  
770 the *P<sub>proVI</sub>-gfp* reporter plasmid and the expression plasmid *pcosR*. Specific fluorescence of the  
771 CosR-expressing strain was compared to an empty vector strain. Mean and standard deviation of  
772 two biological replicates are shown. Statistics were calculated using a Student's t-test (\*,  $P <$   
773 0.05).

774 **Figure 7.** (A) A 220-bp section of the regulatory region of *cosR* was split into two similarly  
775 sized probes for EMSAs, *P<sub>cosR</sub>* A and B, 105-bp and 142-bp, respectively. The regulatory  
776 region used for the GFP reporter assay is indicated with a bracket. (B) An EMSA was performed  
777 with increasing concentrations of purified CosR-His (0 to 0.66  $\mu$ M) and 30 ng of each probe with  
778 DNA:protein molar ratios of 1:0, 1:1, 1:5, and 1:10. (C) A *P<sub>cosR</sub>-gfp* reporter assay was performed  
779 in *E. coli* strain MKH13 the *pcosR* expression plasmid. Specific fluorescence of the CosR-  
780 expressing strain was compared to a strain harboring empty expression vector. Mean and  
781 standard deviation of two biological replicates are shown.

782 **Figure 8.** (A) Expression of a *P<sub>betI</sub>-gfp* transcriptional fusion reporter in wild-type and a  $\Delta$ *betI*  
783 mutant. Relative fluorescence intensity (RFU) and OD<sub>595</sub> were measured after growth in (A)  
784 M9G3% or (B) M9G3% with the addition of choline. Specific fluorescence was calculated by  
785 dividing RFU by OD. Mean and standard deviation of two biological replicates are shown.  
786 Statistics were calculated using a Student's t-test (\*,  $P <$  0.05). (C) A reporter assay was  
787 conducted in *E. coli* MKH13 using the *P<sub>betI</sub>-gfp* reporter plasmid and an expression plasmid with  
788 full-length *betI* (*pbetI*). The specific fluorescence was calculated and compared to a strain with  
789 an empty expression vector (pBBR1MCS). Mean and standard deviation of two biological  
790 replicates are shown. Statistics were calculated using a Student's t-test (\*\*\*,  $P <$  0.001).

791 **Figure 9. (A)** Expression of a  $P_{betI}$ -*gfp* transcriptional fusion reporter in wild-type and  $\Delta opaR$   
792 mutant strains. Relative fluorescence intensity (RFU) and OD<sub>595</sub> were measured after growth in  
793 M9G3%. Specific fluorescence was calculated by dividing RFU by OD. Mean and standard  
794 deviation of two biological replicates are shown. Statistics were calculated using a one-way  
795 ANOVA with a Tukey-Kramer *post hoc* test (\*\*,  $P < 0.01$ ). **(B)** An EMSA was performed with  
796 30 ng of each *PbetI* probe A-E utilized previously in the CosR EMSA and purified OpaR protein  
797 (between 0.47 and 0.82  $\mu$ M) in a 1:20 molar ratio of DNA:protein.

798 **Figure 10.** Schematic of the genomic context of CosR homologs from select Vibrionaceae  
799 species. Open reading frames are designated by arrows.

800 **Table 1.** Strains and plasmids used in this study

801 **Table 2.** Primers used in this study

802

803

804

805

806

807

808



809

810

811

812

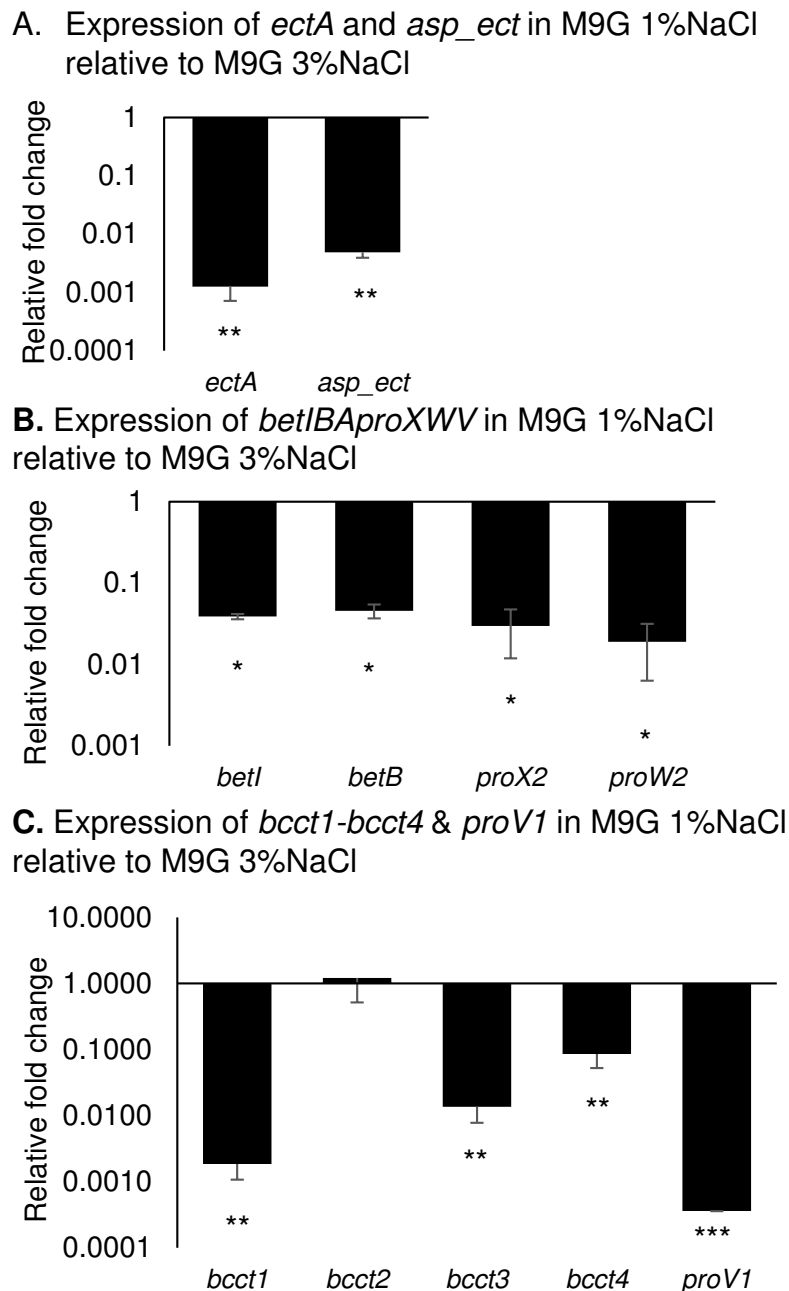

**Figure 1.** RNA was isolated from RIMD2210633 after growth in M9G1% and M9G3% at an OD<sub>595</sub> of 0.45. Expression analysis of (A) *ectA*, *asp\_ect*, (B) *betI*, *betB*, *proX2*, *proW2* (C) *bcct1*, *bcct2*, *bcct3*, *bcct4* and *proV1* by quantitative real time PCR (qPCR). 16S was used for normalization. Expression levels shown are levels in M9G1% relative to M9G3%. Mean and standard error of two biological replicates are shown. Statistics were calculated using a Student's t-test (\*, P < 0.05; \*\*, P < 0.01; \*\*\*, P < 0.001).

**A.** Expression of *ectA* and *asp\_ect* in  $\Delta\text{cosR}$  relative to WT in M9G1%

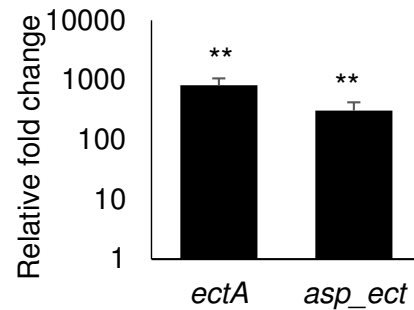

**B.** Expression of *betI*, *betB*, *proX2*, *proW2* in  $\Delta\text{cosR}$  relative to WT in M9G1%

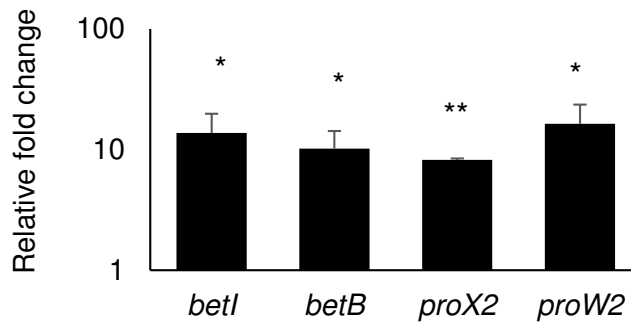

**C.** Expression of *bcct1*, *bcct2*, *bcct3*, *bcct4*, and *proV1* in  $\Delta\text{cosR}$  relative to WT in M9G1%

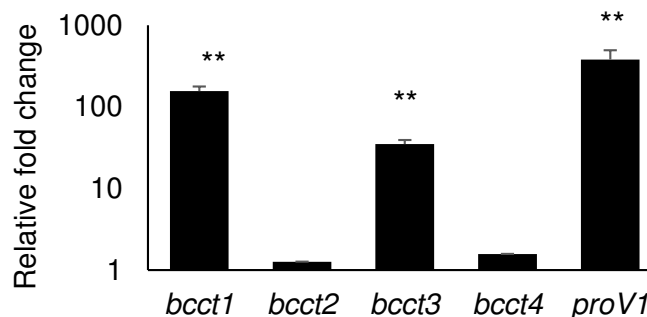

**Figure 2.** RNA was isolated from RIMD2210633 and  $\Delta\text{cosR}$  after growth in M9G1% at an  $\text{OD}_{595}$  of 0.45. Expression analysis of (A) *ectA*, *asp\_ect*, (B) *betI*, *betB*, *proX2*, *proW2* (C) *bcct1*, *bcct2*, *bcct3*, *bcct4* and *proV1* by qPCR. 16S was used for normalization. Expression levels shown are levels in  $\Delta\text{cosR}$  relative to wild-type. Mean and standard error of two biological replicates are shown. Statistics were calculated using a Student's t-test (\*,  $P < 0.05$ ; \*\*,  $P < 0.01$ ).

**A.** *betI**B**A**proXWV* regulatory region

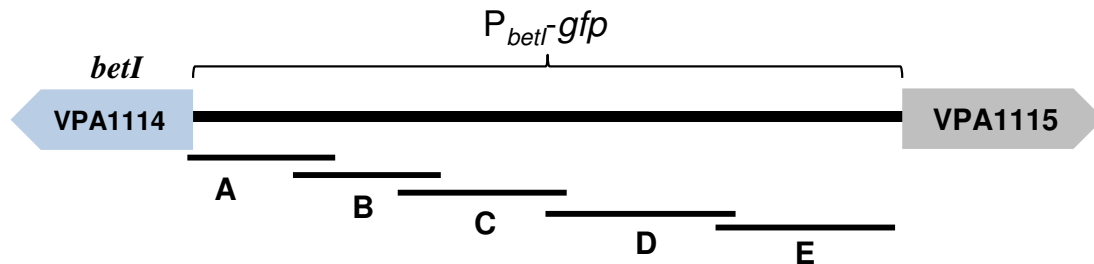

**B.**  $P_{betI}$  CosR EMSA

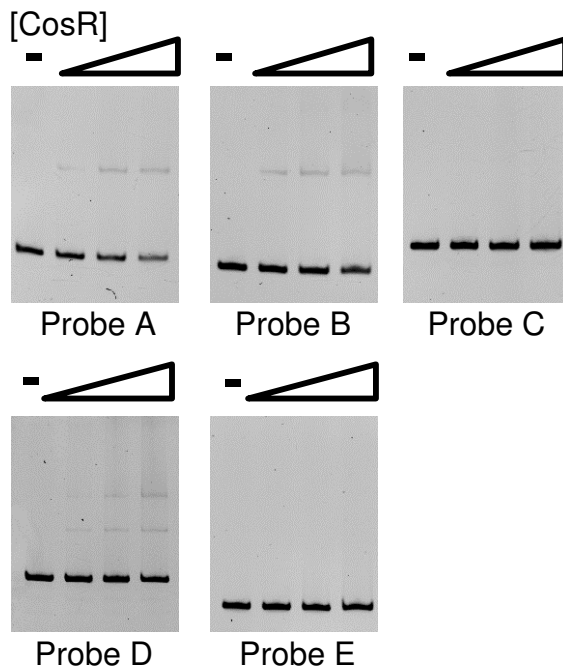

**C.**  $P_{betI-gfp}$  reporter assay in *E. coli*

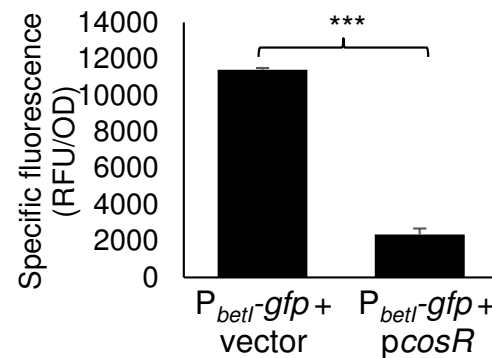

**Figure 3.** (A) The regulatory region of *betI**B**A**proXWV* was divided into five probes for EMSAs,  $P_{betI}$  A-E, 125-bp, 112-bp, 142-bp, 202-bp and 158-bp, respectively. The regulatory region used for the GFP reporter assay is indicated with a bracket. (B) An EMSA was performed with purified CosR-His (0 to 0.62  $\mu$ M) and 30 ng of each  $P_{betI}$  probe, with DNA:protein molar ratios of 1:0, 1:1, 1:5, and 1:10. (C) A  $P_{betI-gfp}$  reporter assay was performed in *E. coli* strain MKH13 containing an expression plasmid with full-length *cosR* (*pcosR*). Specific fluorescence of the CosR-expressing strain was compared to a strain harboring empty expression vector. Mean and standard deviation of two biological replicates are shown. Statistics were calculated using a Student's t-test (\*\*\*,  $P < 0.001$ ).

**A.** *bcct1* regulatory region

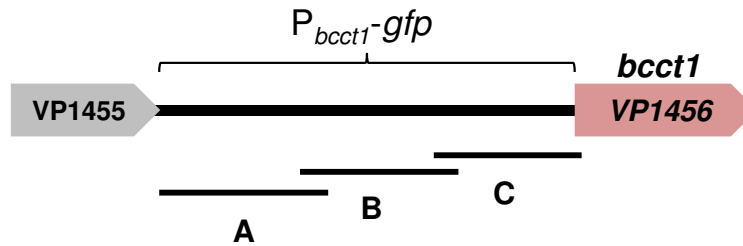

**B.** *Pbcct1* CosR EMSA

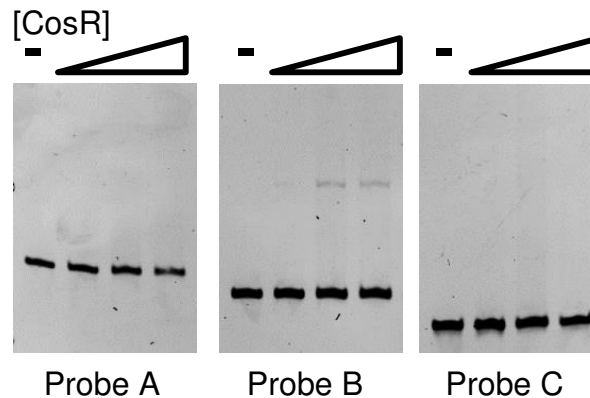

**C.** *Pbcct1-gfp* reporter assay in *E. coli*

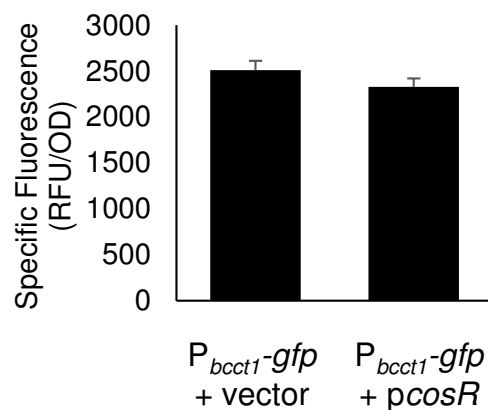

**Figure 4.** (A) The regulatory region of *bcct1* was divided into three similarly sized probes for EMSAs, *Pbcct1* A-C, 120-bp, 110-bp, and 101-bp, respectively. The regulatory region used for the GFP reporter assay is indicated with a bracket. (B) An EMSA was performed with purified CosR-His (0 to 0.69  $\mu$ M) and 30 ng of *Pbcct1* probe with DNA:protein molar ratios of 1:0, 1:1, 1:5, and 1:10. (C) A *Pbcct1-gfp* reporter assay was performed in *E. coli* strain MKH13 containing an expression plasmid with full-length *cosR* (*pcosR*). Specific fluorescence of the CosR-expressing strain was compared to a strain harboring empty expression vector (pBBR1MCS). Mean and standard deviation of two biological replicates are shown. Statistics were calculated using a Student's t-test (\*\*,  $P < 0.01$ ).

**A. *bcct3* regulatory region**

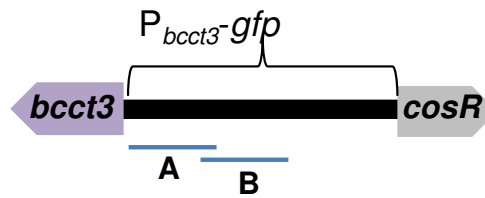

**B. *Pbcct3* CosR EMSA**

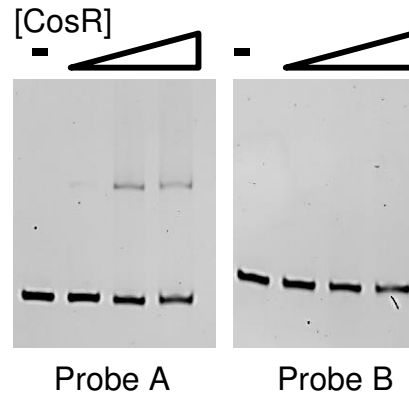

**C. *Pbcct3-gfp* reporter assay in *E. coli***

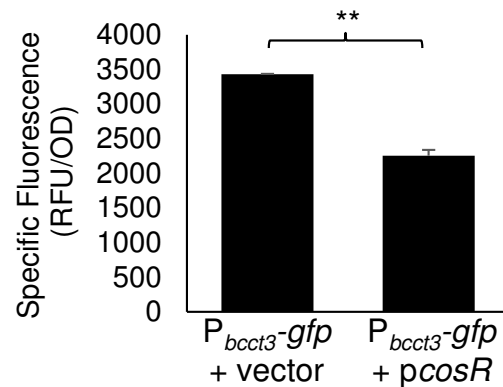

**D. *Pbcct2* and *Pbcct4* CosR EMSA**

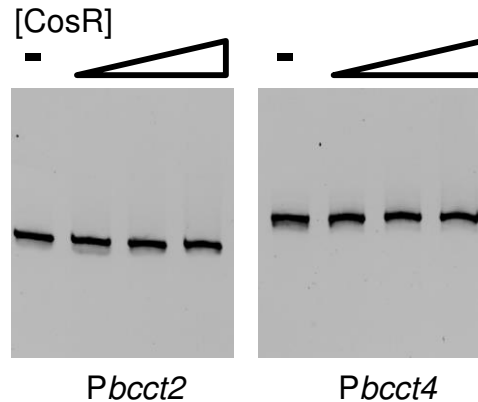

**Figure 5. (A)** A 196-bp portion of the regulatory region of *bcct3* was split into two probes for EMSAs, *Pbcct3* A and B, 108-bp and 107-bp, respectively. The regulatory region used for the GFP reporter assay is indicated with a bracket. **(B)** An EMSA was performed with purified CosR-His (0 to 0.65  $\mu$ M) and 30 ng of *Pbcct3* probe with DNA:protein molar ratios of 1:0, 1:1, 1:5, and 1:10. **(C)** *P<sub>bcct3-gfp</sub>* reporter assay was performed in *E. coli* strain MKH13 containing an expression plasmid with full-length *cosR* (*pcosR*). Specific fluorescence of the CosR-expressing strain was compared to a strain harboring empty expression vector (pBBR1MCS). Mean and standard deviation of two biological replicates are shown. Statistics were calculated using a Student's t-test (\*\*,  $P < 0.01$ ). **(D)** An EMSA was performed with CosR-His (0 to 0.18  $\mu$ M) and probes of the regulatory regions of *bcct2* and *bcct4*. Each lane contains 30 ng of DNA and DNA:protein molar ratios of 1:0, 1:1, 1:5, and 1:10.

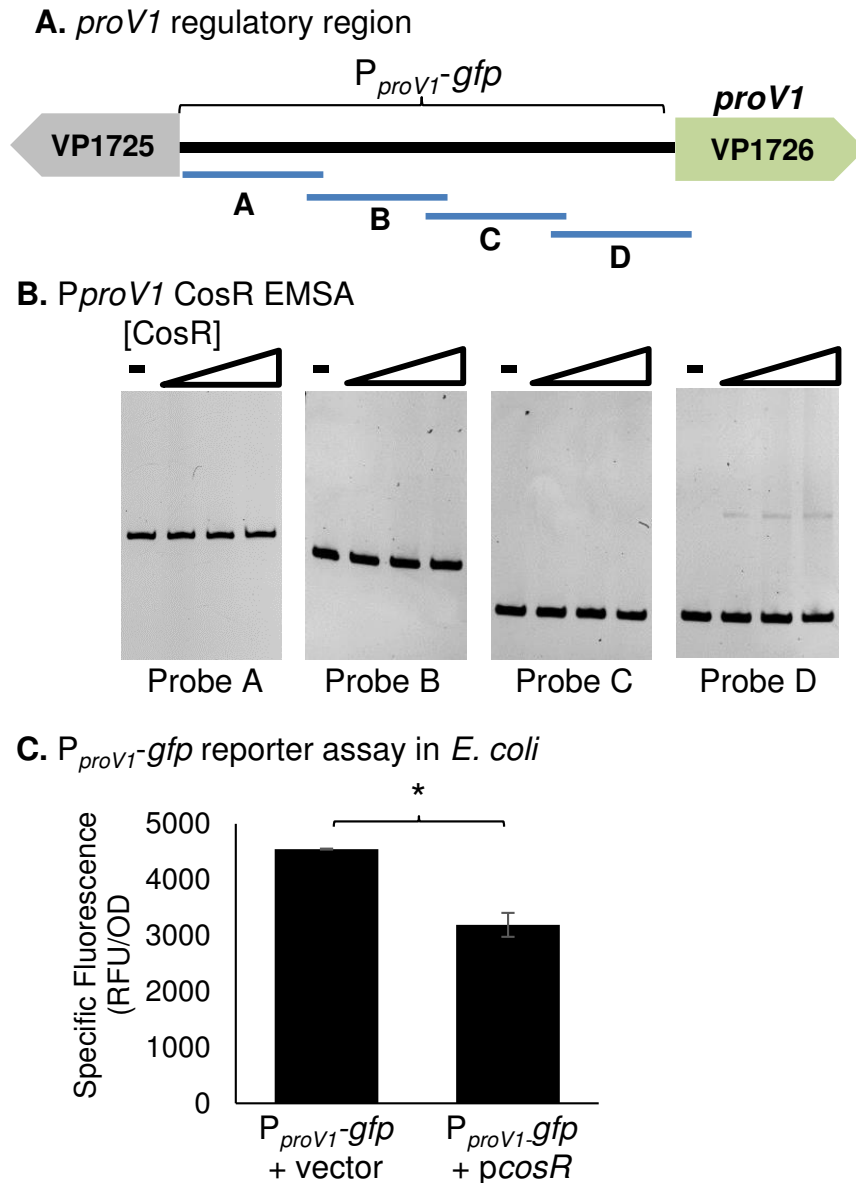

**Figure 6.** (A) The 447-bp regulatory region of the *proV1* gene was divided into four probes for EMSAs, *P<sub>proV1</sub>* A-D, 160-bp, 134-bp, 108-bp and 109-bp, respectively. The regulatory region used for the GFP reporter assay is indicated with a bracket. (B) An EMSA was performed with purified CosR-His (0 to 0.64  $\mu$ M) and 30 ng of each *P<sub>proV1</sub>* probe with DNA:protein molar ratios of 1:0, 1:1, 1:5, and 1:10. (C) A reporter assay was conducted in *E. coli* MKH13 harboring the *P<sub>proV1-gfp</sub>* reporter plasmid and the expression plasmid *pcosR*. Specific fluorescence of the CosR-expressing strain was compared to an empty vector strain. Mean and standard deviation of two biological replicates are shown. Statistics were calculated using a Student's t-test (\*,  $P < 0.05$ ).

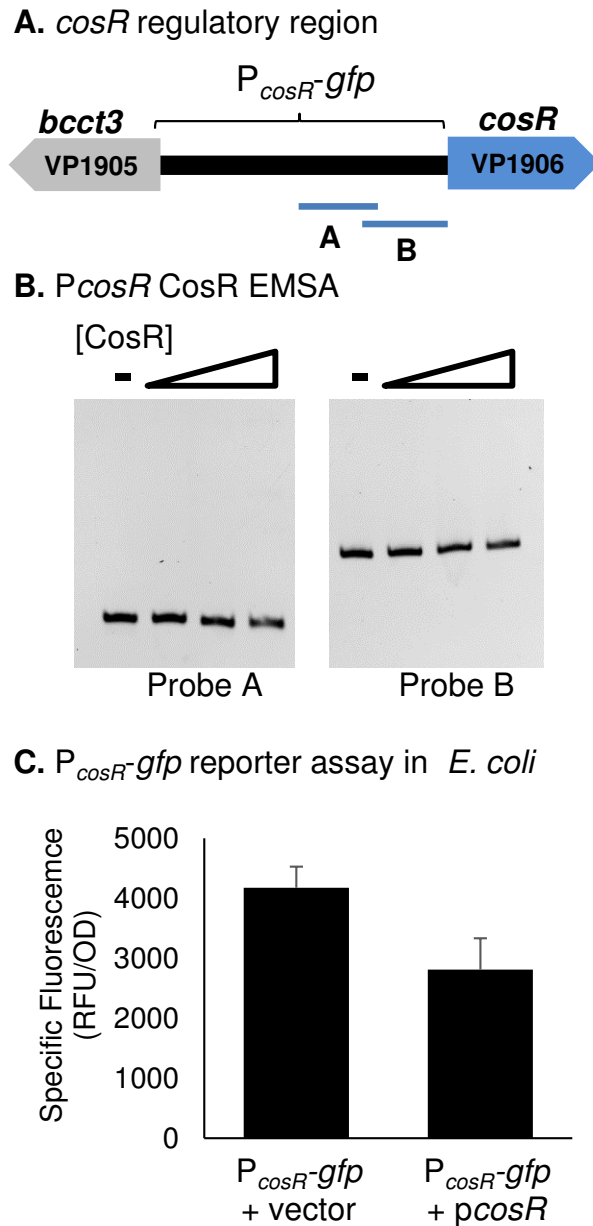

**Figure 7.** (A) A 220-bp section of the regulatory region of *cosR* was split into two similarly sized probes for EMSAs,  $P_{cosR}$  A and B, 105-bp and 142-bp, respectively. The regulatory region used for the GFP reporter assay is indicated with a bracket. (B) An EMSA was performed with increasing concentrations of purified CosR-His (0 to 0.66  $\mu$ M) and 30 ng of each probe with DNA:protein molar ratios of 1:0, 1:1, 1:5, and 1:10. (C) A  $P_{cosR-gfp}$  reporter assay was performed in *E. coli* strain MKH13 the *pcosR* expression plasmid. Specific fluorescence of the CosR-expressing strain was compared to a strain harboring empty expression vector. Mean and standard deviation of two biological replicates are shown.



**A.**  $P_{betI}$ -*gfp* reporter assay  
in *V. parahaemolyticus*

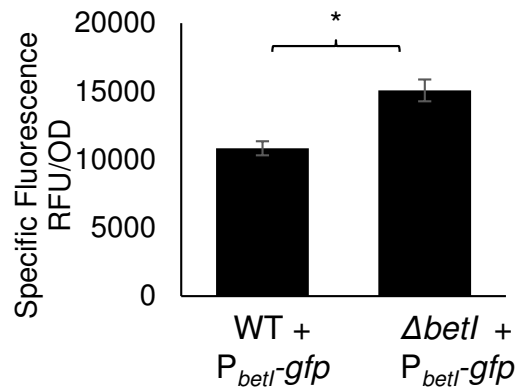

**B.**  $P_{betI}$ -*gfp* reporter assay in *V. parahaemolyticus* with choline

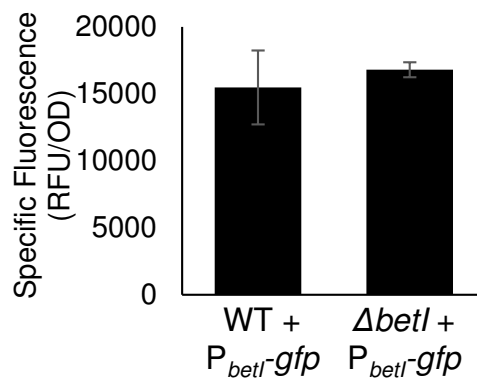

**C.**  $P_{betI}$ -*gfp* reporter assay in *E. coli*

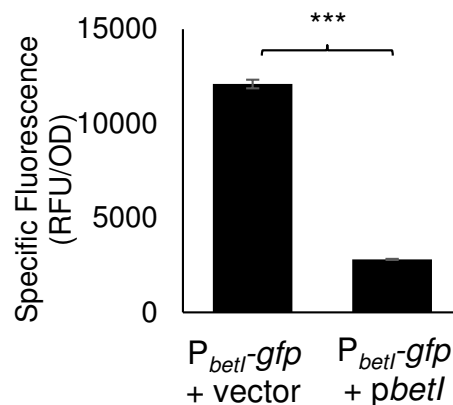

**Figure 8.** (A) Expression of a  $P_{betI}$ -*gfp* transcriptional fusion reporter in wild-type and a  $\Delta betI$  mutant. Relative fluorescence intensity (RFU) and  $OD_{595}$  were measured after growth in (A) M9G3% or (B) M9G3% with the addition of choline. Specific fluorescence was calculated by dividing RFU by OD. Mean and standard deviation of two biological replicates are shown. Statistics were calculated using a Student's t-test (\*,  $P < 0.05$ ). (C) A reporter assay was conducted in *E. coli* MKH13 using the  $P_{betI}$ -*gfp* reporter plasmid and an expression plasmid with full-length *betI* (*pbetI*). The specific fluorescence was calculated and compared to a strain with an empty expression vector (pBBR1MCS). Mean and standard deviation of two biological replicates are shown. Statistics were calculated using a Student's t-test (\*\*\*,  $P < 0.001$ ).

**A.**  $P_{betI}$ -*gfp* reporter assay in *V. parahaemolyticus*

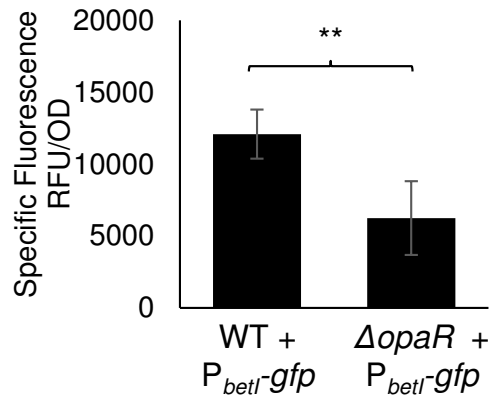

**B.**  $P_{betI}$  OpaR EMSA

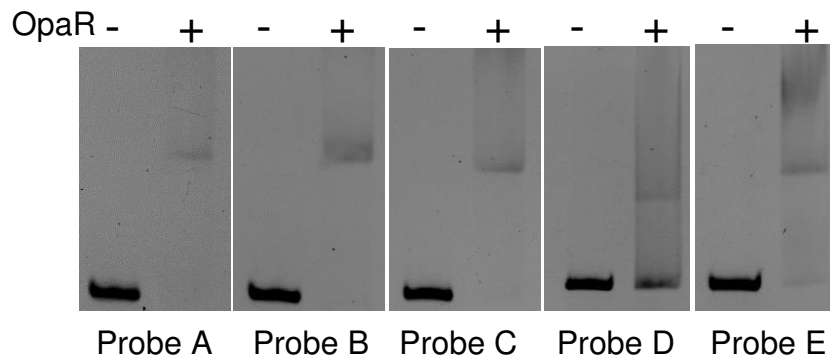

**Figure 9.** (A) Expression of a  $P_{betI}$ -*gfp* transcriptional fusion reporter in wild-type and  $\Delta opaR$  mutant strains. Relative fluorescence intensity (RFU) and  $OD_{595}$  were measured after growth in M9G3%. Specific fluorescence was calculated by dividing RFU by OD. Mean and standard deviation of two biological replicates are shown. Statistics were calculated using a one-way ANOVA with a Tukey-Kramer *post hoc* test (\*\*,  $P < 0.01$ ). (B) An EMSA was performed with 30 ng of each  $P_{betI}$  probe A-E utilized previously in the CosR EMSA and purified OpaR protein (between 0.47 and 0.82  $\mu M$ ) in a 1:20 molar ratio of DNA:protein.

***Vibrio parahaemolyticus* and more than 50 *Vibrio* species**

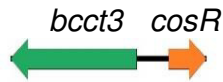

***V. cyclitrophicus/V. splendidus/V. crassotreae/V. lentus/V. celticus***

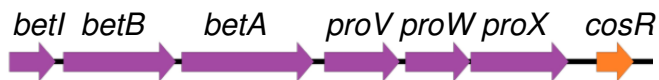

***Vibrio tasmaniensis/Vibrio* sp. MED222**

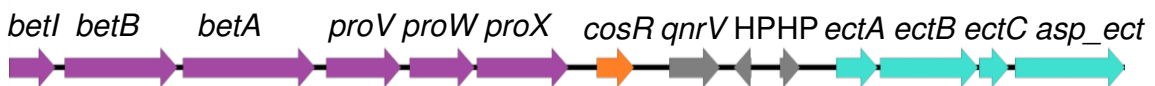

***A. wodanis* AWOD1/*A. wodanis* 06/09/160**

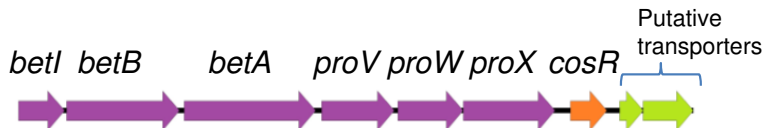

***A. wodanis* AWOD1/*A. wodanis* 06/09/160**

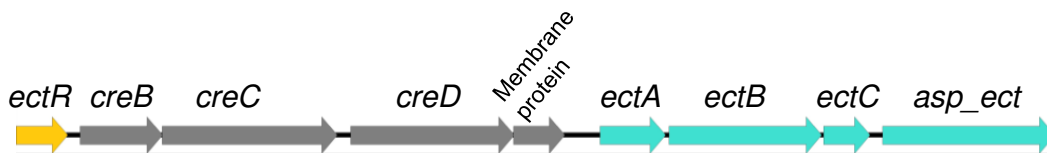

***A. fischeri* MJ11/*A. fischeri* ES114**

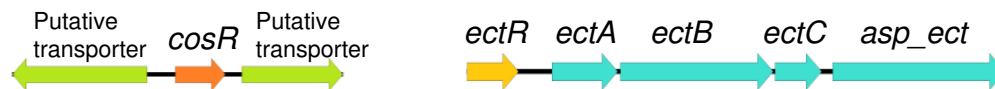

**Figure 10.** Schematic of the genomic context of CosR homologs from select Vibrionaceae species. Open reading frames are designated by arrows.
